# Supplementary material for: Cohort profile: the Women’s Health Accelerometry Collaboration
Source: PubMed Central journal article supplement — BMJ Open. 2021 Nov 29;11(11):e052038. doi: 10.1136/bmjopen-2021-052038 (PMC8633996; doi:10.1136/bmjopen-2021-052038), 2021-11-29
Supplement: bmjopen-2021-052038.draft_revisions.pdf [file bmjopen-2021-052038.draft_revisions.pdf]

# BMJ Open

BMJ Open is committed to open peer review. As part of this commitment we make the peer review history of every article we publish publicly available.

When an article is published we post the peer reviewers' comments and the authors' responses online. We also post the versions of the paper that were used during peer review. These are the versions that the peer review comments apply to.

The versions of the paper that follow are the versions that were submitted during the peer review process. They are not the versions of record or the final published versions. They should not be cited or distributed as the published version of this manuscript.

BMJ Open is an open access journal and the full, final, typeset and author-corrected version of record of the manuscript is available on our site with no access controls, subscription charges or pay-per-view fees (<http://bmjopen.bmj.com>).

If you have any questions on BMJ Open's open peer review process please email [info.bmjopen@bmj.com](mailto:info.bmjopen@bmj.com)

# BMJ Open

## Cohort Profile: The Women's Health Accelerometry Collaboration

|                               |                                                                                                                                                                                                                                                                                                                                                                                                                                                                                                                                                                                                                                                                                                                                                                                                                                                                                                                                                                                                                                                                                                                                                           |
|-------------------------------|-----------------------------------------------------------------------------------------------------------------------------------------------------------------------------------------------------------------------------------------------------------------------------------------------------------------------------------------------------------------------------------------------------------------------------------------------------------------------------------------------------------------------------------------------------------------------------------------------------------------------------------------------------------------------------------------------------------------------------------------------------------------------------------------------------------------------------------------------------------------------------------------------------------------------------------------------------------------------------------------------------------------------------------------------------------------------------------------------------------------------------------------------------------|
| Journal:                      | <i>BMJ Open</i>                                                                                                                                                                                                                                                                                                                                                                                                                                                                                                                                                                                                                                                                                                                                                                                                                                                                                                                                                                                                                                                                                                                                           |
| Manuscript ID                 | bmjopen-2021-052038                                                                                                                                                                                                                                                                                                                                                                                                                                                                                                                                                                                                                                                                                                                                                                                                                                                                                                                                                                                                                                                                                                                                       |
| Article Type:                 | Cohort profile                                                                                                                                                                                                                                                                                                                                                                                                                                                                                                                                                                                                                                                                                                                                                                                                                                                                                                                                                                                                                                                                                                                                            |
| Date Submitted by the Author: | 05-Apr-2021                                                                                                                                                                                                                                                                                                                                                                                                                                                                                                                                                                                                                                                                                                                                                                                                                                                                                                                                                                                                                                                                                                                                               |
| Complete List of Authors:     | <p>Evenson, Kelly; University of North Carolina at Chapel Hill Gillings School of Global Public Health, Department of Epidemiology<br/>         Bellettiere, John; University of California San Diego<br/>         Cuthbertson, Carmen ; University of North Carolina at Chapel Hill Gillings School of Global Public Health, Department of Epidemiology<br/>         Di, Chongzhi; Fred Hutchinson Cancer Research Center<br/>         Dushkes, Rimma; Brigham and Women's Hospital, Department of Preventive Medicine<br/>         Howard, Annie; University of North Carolina at Chapel Hill Gillings School of Global Public Health, Department of Biostatistics<br/>         Parada Jr., Humberto; San Diego State University; University of California San Diego<br/>         Schumacher, Benjamin; University of California San Diego; San Diego State University<br/>         Shiroma, Eric J.; National Institute on Aging<br/>         Wang, Guangxing; Fred Hutchinson Cancer Research Center<br/>         Lee, I-Min; Harvard Medical School<br/>         LaCroix, Andrea; University of California San Diego, Department of Epidemiology</p> |
| Keywords:                     | EPIDEMIOLOGY, ONCOLOGY, PRIMARY CARE, PUBLIC HEALTH                                                                                                                                                                                                                                                                                                                                                                                                                                                                                                                                                                                                                                                                                                                                                                                                                                                                                                                                                                                                                                                                                                       |
|                               |                                                                                                                                                                                                                                                                                                                                                                                                                                                                                                                                                                                                                                                                                                                                                                                                                                                                                                                                                                                                                                                                                                                                                           |

SCHOLARONE™  
Manuscripts

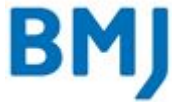

I, the Submitting Author has the right to grant and does grant on behalf of all authors of the Work (as defined in the below author licence), an exclusive licence and/or a non-exclusive licence for contributions from authors who are: i) UK Crown employees; ii) where BMJ has agreed a CC-BY licence shall apply, and/or iii) in accordance with the terms applicable for US Federal Government officers or employees acting as part of their official duties; on a worldwide, perpetual, irrevocable, royalty-free basis to BMJ Publishing Group Ltd ("BMJ") its licensees and where the relevant Journal is co-owned by BMJ to the co-owners of the Journal, to publish the Work in this journal and any other BMJ products and to exploit all rights, as set out in our [licence](#).

The Submitting Author accepts and understands that any supply made under these terms is made by BMJ to the Submitting Author unless you are acting as an employee on behalf of your employer or a postgraduate student of an affiliated institution which is paying any applicable article publishing charge ("APC") for Open Access articles. Where the Submitting Author wishes to make the Work available on an Open Access basis (and intends to pay the relevant APC), the terms of reuse of such Open Access shall be governed by a Creative Commons licence – details of these licences and which [Creative Commons](#) licence will apply to this Work are set out in our licence referred to above.

Other than as permitted in any relevant BMJ Author's Self Archiving Policies, I confirm this Work has not been accepted for publication elsewhere, is not being considered for publication elsewhere and does not duplicate material already published. I confirm all authors consent to publication of this Work and authorise the granting of this licence.

1  
2  
3 Title: Cohort Profile: The Women's Health Accelerometry Collaboration  
4

5 Authors

6 Kelly R. Evenson, PhD, MS  
7 Department of Epidemiology, Gillings School of Global Public Health, University of North  
8 Carolina – Chapel Hill, Chapel Hill, North Carolina, United States  
9 Email: [ke@unc.edu](mailto:ke@unc.edu)  
10

11 John Bellettiere, PhD, MPH  
12 Division of Epidemiology, Herbert Wertheim School of Public Health and Human Longevity  
13 Science, University of California, San Diego, La Jolla, CA  
14 Email: [jbellettiere@health.ucsd.edu](mailto:jbellettiere@health.ucsd.edu)  
15

16 Carmen C. Cuthbertson, PhD, MCN  
17 Department of Epidemiology, Gillings School of Global Public Health, University of North  
18 Carolina – Chapel Hill, Chapel Hill, North Carolina, United States  
19 Email: [carmenc@email.unc.edu](mailto:carmenc@email.unc.edu)  
20

21 Chongzhi Di, PhD  
22 Division of Public Health Sciences, Fred Hutchinson Cancer Research Center, Seattle,  
23 Washington, United States  
24 Email: [cdi@fredhutch.org](mailto:cdi@fredhutch.org)  
25

26 Rimma Dushkes, PhD  
27 Division of Preventive Medicine, Brigham and Women's Hospital, Boston, MA, United States  
28 Email: [rdushkes@research.bwh.harvard.edu](mailto:rdushkes@research.bwh.harvard.edu)  
29

30 Annie Green Howard, PhD  
31 Department of Biostatistics, Gillings School of Global Public Health, University of North Carolina  
32 – Chapel Hill, Chapel Hill, North Carolina, United States  
33 Carolina Population Center, University of North Carolina – Chapel Hill, Chapel Hill, North  
34 Carolina, United States  
35 Email: [aghoward@email.unc.edu](mailto:aghoward@email.unc.edu)  
36

37 Humberto Parada Jr, PhD, MPH  
38 Division of Epidemiology and Biostatistics, School of Public Health, San Diego State University,  
39 San Diego, California, United States  
40 Moores Cancer Center, University of California, San Diego, La Jolla, California, United States  
41 Email: [hparada@sdsu.edu](mailto:hparada@sdsu.edu)  
42

43 Benjamin T. Schumacher, MPH  
44 Herbert Wertheim School of Public Health and Longevity Science, UC San Diego School of  
45 Medicine, San Diego, California, United States  
46 Division of Epidemiology and Biostatistics, School of Public Health, San Diego State University,  
47 San Diego, California, United States  
48 Email: [btschuma@health.ucsd.edu](mailto:btschuma@health.ucsd.edu)  
49

50 Eric J Shiroma, ScD  
51 Laboratory of Epidemiology and Population Science  
52 National Institute on Aging, Baltimore, Maryland, United States  
53 Email: [eric.shiroma@nih.gov](mailto:eric.shiroma@nih.gov)  
54

1  
2  
3  
4 Guangxing Wang, PhD  
5 Division of Public Health Sciences, Fred Hutchinson Cancer Research Center, Seattle,  
6 Washington, United States  
7 Email: [gwang234@fredhutch.org](mailto:gwang234@fredhutch.org)  
8

9 \*I-Min Lee, MBBS, ScD  
10 Division of Preventive Medicine, Brigham and Women's Hospital, Harvard Medical School,  
11 Boston, MA, United States  
12 Department of Epidemiology, Harvard T.H. Chan School of Public Health, Boston, MA, United  
13 States  
14 Email: [ilee@rics.bwh.harvard.edu](mailto:ilee@rics.bwh.harvard.edu)  
15

16 \*Andrea Z. LaCroix, PhD  
17 Division of Epidemiology, Herbert Wertheim School of Public Health and Human Longevity  
18 Science, University of California, San Diego, La Jolla, CA  
19 Email: [alacroix@health.ucsd.edu](mailto:alacroix@health.ucsd.edu)  
20  
21

22 **\*joint senior authors**  
23  
24  
25

26 Address for Correspondence: Kelly R. Evenson, 123 W Franklin Street, Building C, Suite 410,  
27 University of NC, Gillings School of Global Public Health, Department of Epidemiology, Chapel  
28 Hill, North Carolina, USA 27599-8050, email: [ke@unc.edu](mailto:ke@unc.edu)  
29  
30  
31  
32  
33  
34  
35  
36  
37  
38  
39  
40  
41  
42  
43  
44  
45  
46  
47  
48  
49  
50  
51  
52  
53  
54  
55  
56  
57  
58  
59  
60

## Abstract

Purpose: This paper describes the Women's Health Accelerometry Collaboration, a consortium of two prospective cohort studies of women age 62 years or older, harmonized to explore the association of accelerometer-assessed physical activity and sedentary behavior with cancer incidence and mortality.

Participants: A total of 23,443 women were included in the study; 17,061 from the Women's Health Study (WHS) and 6382 from the Women's Health Initiative Objective Physical Activity and Cardiovascular Health (WHI/OPACH) Study.

Findings to Date: Accelerometry, cancer outcomes, and covariate harmonization was conducted to align the two cohort studies. Physical activity and sedentary behavior were measured using similar procedures with an ActiGraph GT3X+ accelerometer, worn at the hip for one week, during 2011-2014 for WHS and 2012-2014 for WHI/OPACH. Cancer outcomes were ascertained via ongoing surveillance using physician adjudicated cancer diagnosis. Relevant covariates were measured using questionnaire or physical assessments. Among 23,443 women who wore the accelerometer for at least 10 hours on a single day, 22,868 women wore the accelerometer at least 10 hours/day on  $\geq 4$  of 7 days. The analytic sample ( $n=22,852$ ) averaged 4976 (standard deviation (SD) 2669) steps/day and engaged in an average of 80.8 (SD 46.5) minutes/day of moderate-to-vigorous, 105.5 (SD 33.3) minutes/day of light high, and 182.1 (SD 46.1) minutes/day of light low physical activity. A mean of 8.7 (SD 1.7) hours/day were spent in sedentary behavior. Overall, 11.8% of the cohort had a cancer diagnosis (other than non-melanoma skin cancer) at the time of accelerometry measurement.

Future Plans: Using the harmonized cohort, we will access ongoing cancer surveillance to quantify the associations of physical activity and sedentary behavior with cancer incidence and mortality.

Keywords: accelerometry; cancer; cohort study; physical activity; sedentary behavior

### **Strengths and limitations of this study**

- The combined prospective cohort will address research questions pertaining to accelerometer-assessed physical activity and sedentary behavior with cancer outcomes due to similar measurement protocols for the exposures, outcomes, and important covariates.
- A variety of sociodemographic, behavioral, and medical history were collected over many years prior to accelerometry measurement that allows for control of important confounders.
- Accelerometry was assessed for one week and may not represent behavior during the entire follow-up period.
- This cohort is limited to women age 62 years and older, and thus may not be generalizable to men or to younger adults.

## Introduction

Cancer is the second leading cause of death in the United States for women, with an estimated 289,150 cancer-related deaths and 927,910 new cancer cases predicted to occur among women in 2021.<sup>1</sup> The leading types of new cancer cases for women include breast (30%), lung and bronchus (13%), colon and rectum (8%), uterine corpus (7%), skin melanoma (5%), and non-Hodgkin lymphoma (4%).<sup>1</sup> Cancer risk increases with age; however, certain screening tests are not recommended for adults 75 years or older since the harms outweigh the benefits.<sup>2</sup> This results in cancer that is often diagnosed at a more advanced stage among women 75 years or older than among women under the age of 75 years.

With a rapidly growing older population, there will be an increased demand for cancer-related health care. Among women at age 85 years without a history of cancer, the probability of cancer diagnosis in their remaining lifetime is 12.8% and the probability of cancer death is 9.6%.<sup>2</sup> Focusing on risk factors that are modifiable in later life that can help reduce cancer burden, such as physical activity and sedentary behavior, should be a public health priority.

Observational studies consistently report associations between lower self-reported moderate-to-vigorous leisure-time physical activity and increased risk of several cancer types.<sup>3</sup> In support of this, the 2018 United States' Physical Activity Guidelines Advisory Committee (PAGAC),<sup>4</sup> updated in 2019,<sup>5</sup> identified strong favorable associations comparing the highest to the lowest levels of physical activity on the risk of developing bladder, breast, colon, endometrium, esophageal adenocarcinoma, renal, and gastric cancers, and moderately favorable associations for lung cancer. However, there was a limited dose response gradient for esophageal adenocarcinoma, renal, and lung cancers. The review indicated limited evidence on physical activity occurring outside of leisure-time, and a lack of associations with physical activity by population subgroups, such as by age, socioeconomic status, or race/ethnicity.



1  
2  
3  
4  
5 The PAGAC also reported limited evidence on the relationship of sedentary behavior with  
6 cancer incidence and mortality.<sup>4,6</sup> Evidence supporting the PAGAC statements were primarily  
7 based on self-reported physical activity and sedentary behavior data. Self-reported light activity  
8 is especially difficult to recall, and is the most common intensity level older adults participate  
9 in.<sup>7,8</sup> To date, few studies of older adults have explored accelerometer-assessed physical  
10 activity and sedentary behavior with cancer incidence and mortality.<sup>9-12</sup> The scarcity of evidence  
11 is likely due to the need for larger studies with longer follow-up time to investigate cancer  
12 outcomes, particular for the less common tumor sites.  
13  
14  
15  
16  
17  
18  
19  
20  
21  
22  
23

24 The Women's Health Accelerometry Collaboration will explore the associations of  
25 accelerometer-assessed physical activity and sedentary behavior with cancer outcomes by  
26 combining data from two large prospective studies: the Women's Health Study (WHS) and the  
27 Women's Health Initiative Objective Physical Activity and Cardiovascular Health (WHI/OPACH)  
28 Study. This endeavor requires harmonization of accelerometry, cancer outcomes, and  
29 covariates. The study will provide important insights on cancer incidence and mortality among  
30 women 62 years and older. The specific aim for this paper is to describe the rationale,  
31 methodology, proposed analysis plan, and characteristics of the cohort.  
32  
33  
34  
35  
36  
37  
38  
39  
40  
41  
42  
43

### **Cohort Description**

44  
45 In order to address the scientific gaps, we harmonized two cohort studies of women 62 years  
46 and older using similar data collection methodologies to quantify the associations between  
47 physical activity and sedentary behavior with multiple site-specific incident cancers and overall  
48 fatal cancers. Patients and/or the public were not involved in the design, conduct, reporting, or  
49 dissemination of this research.  
50  
51  
52  
53  
54  
55  
56  
57  
58  
59  
60

1  
2  
3 WHS: The WHS is a completed randomized trial (1992–2004) testing aspirin, beta-carotene,  
4 and vitamin E for preventing cardiovascular disease and cancer among 39,876 healthy United  
5 States women at least 45 years of age.<sup>13-15</sup> When the trial ended, women were invited to  
6 continue in an observational study. Of the 33,682 alive, 89% of women consented, reporting on  
7 their health habits and medical history annually on questionnaires. From 2011-2014, an ancillary  
8 study was conducted to collect accelerometry among participants.<sup>16</sup> In 2011, 29,494 women  
9 were alive and 18,289 agreed to participate and were sent an accelerometer, 6931 declined  
10 participation, 1456 were ineligible because they were unable to walk outside of the home, and  
11 the remaining 2818 did not respond to the invitation. Overall, 17,466 women returned the  
12 accelerometers for downloading. All study protocols were approved by the Brigham and  
13 Women's Hospital Institutional Review Board, and all women gave written informed consent.  
14  
15  
16  
17  
18  
19  
20  
21  
22  
23  
24  
25  
26  
27

28 WHI/OPACH: The WHI/OPACH Study<sup>17</sup> is an ancillary study to the WHI Long Life Study.<sup>18</sup> The  
29 ancillary study was designed to collect physical activity and sedentary behavior measured by  
30 accelerometry and self-report, and to collect detailed data on incident falls using daily falls  
31 calendars collected for up to 13 months. The primary outcomes of the original study included  
32 mortality,<sup>19</sup> falls,<sup>20</sup> and cardiovascular disease.<sup>21,22</sup> From 2012-2014, 9252 women consented to  
33 the WHI Long Life Study. Among those participants, 8618 consented to participate in the  
34 WHI/OPACH ancillary study collecting accelerometry. From this sample, 58 died before  
35 recruitment, 10 died before receiving the materials, 141 were ineligible (e.g., dementia, residing  
36 in a nursing home, not ambulatory), 765 could not be contacted, and 596 refused to participate.  
37  
38 In summary, 7048 women were sent the accelerometer, a sleep log, the OPACH physical  
39 activity questionnaire (available in this paper<sup>17</sup>), and 13 falls calendars. Overall, 6489 women  
40 returned the accelerometers for downloading. All study protocols were approved by the Fred  
41 Hutchinson Cancer Research Center Institutional Review Board, and all women gave informed  
42 consent.  
43  
44  
45  
46  
47  
48  
49  
50  
51  
52  
53  
54  
55  
56  
57  
58  
59  
60

1  
2  
3  
4  
5 Accelerometry Data Collection: Both cohorts utilized the same accelerometer (ActiGraph  
6 GT3X+ accelerometer (Pensacola, Florida). The triaxial accelerometer was small (4.6x3.3x1.5  
7 cm) and light weight (19 grams), with a dynamic range of +/-6 G. The WHS women were asked  
8 to wear the accelerometer on their right hip, removing it only during sleep, for 7 days. They were  
9 also asked to keep a log documenting wear and non-wear days.<sup>16</sup> The accelerometer and log  
10 were mailed to participants, with a mailer for return.  
11  
12  
13  
14  
15  
16  
17  
18  
19

20 The WHI/OPACH women were asked to wear the accelerometer on their right hip for 7 days,  
21 including night time. The WHI/OPACH women were asked to keep a sleep log for in- and out-of-  
22 bed wear.<sup>23</sup> For women with missing sleep log data, their in-bed and out-of-bed times were  
23 imputed using person-specific means, if available, or the sample mean. Using the sleep log, the  
24 in-bed wear was removed to make the data congruent across the two cohorts. The  
25 accelerometer and log were given to most women at their study visit and were mailed back after  
26 completion.  
27  
28  
29  
30  
31  
32  
33  
34  
35  
36

37 The accelerometer recorded 3-dimensional raw acceleration signals at 30 Hz, which were  
38 aggregated using ActiLife software (version 6) to counts per 15-second epochs with the normal  
39 filter setting. To better detect movement from all directions, vector magnitude (VM) counts were  
40 derived by taking the square root of the sum of the three axes squared. Non-wear time was  
41 assessed using the validated Choi et al. algorithm,<sup>24,25</sup> defined as an interval of at least 90  
42 consecutive minutes of zero VM counts/minute, with allowance of up to one 2-minute period of  
43 nonzero VM counts and requiring that no counts were detected during the 30 minutes upstream  
44 and downstream from that period.  
45  
46  
47  
48  
49  
50  
51  
52  
53  
54  
55  
56  
57  
58  
59  
60

1  
2  
3 Several metrics were used to describe physical activity and sedentary behavior from the  
4 accelerometer. First, average intensity per day was summarized as average VM/15-seconds.  
5  
6 Second, using WHI/OPACH calibration-study derived accelerometry cutpoints, we defined  
7  
8 sedentary behavior and physical activity from receiver operating characteristic curve analyses  
9  
10 that balanced the number of false positives and false negatives.<sup>26</sup> VM/15-second cutpoints were  
11  
12 defined as follows: sedentary 0-18, light low 19-225, light high 226-518, and moderate-to-  
13  
14 vigorous physical activity  $\geq 519$ . Third, a moderate-to-vigorous bout was defined as  $\geq 10$   
15  
16 minutes of consecutive moderate-to-vigorous minutes with allowance for interruptions for up to  
17  
18 20% of the time below the threshold and  $< 5$  consecutive minutes below the threshold. The bout  
19  
20 must start and end with moderate-to-vigorous physical activity. Fourth, average steps per day  
21  
22 was explored, derived from ActiGraph's proprietary algorithm.  
23  
24  
25  
26  
27

28 Cancer Incidence and Mortality Outcomes: WHS participants received annual mailed  
29  
30 questionnaires which asked about health history, including a diagnosis of cancer. Relevant  
31  
32 medical records were obtained for all self-reported cancers (except for non-melanoma skin  
33  
34 cancer).  
35  
36  
37  
38

39 As part of WHI, OPACH participants also received annual mailed questionnaires which asked  
40  
41 about physician diagnosis of new cancer or malignant tumors, hospitalizations, and other health  
42  
43 history. Medical records were obtained for all self-reported cancers except non-melanoma skin  
44  
45 cancer.<sup>27</sup>  
46  
47  
48

49 For both studies, physician adjudicators coded cancer using medical record documents such as  
50  
51 the pathology report, hospital face sheet, operative report, hospital discharge summary,  
52  
53 oncology consultation, radiology report, and tumor registry abstract. The date of cancer  
54  
55 diagnosis is based on one of the following: microscopically-confirmed based on date the tissue  
56  
57  
58

1  
2  
3 that resulted in a positive pathology was removed, not microscopically-confirmed based on the  
4 date of first hospitalization for cancer, self-report only based on date reported by participant, and  
5 both autopsy-only and death certificate-only based on death date.  
6  
7  
8  
9

10  
11 For WHS, an Endpoints Committee of physicians blinded to questionnaire exposure data  
12 reviewed all medical records using pre-specified criteria. A cancer diagnosis was confirmed with  
13 histological or cytological evidence. In the absence of these diagnostic tests, strong clinical  
14 evidence accompanied by radiologic evidence or laboratory markers was used to confirm  
15 cancer occurrence. The histological type, grade, and stage of cancer were recorded. The date  
16 of cancer diagnosis was based on the earliest date of the relevant evidence (e.g., date of  
17 histological confirmation). For cancers diagnosed only on death certificates without prior  
18 medical records, the date of death was used.  
19  
20  
21  
22  
23  
24  
25  
26  
27  
28  
29

30 Coding of cancer type was based on the Surveillance, Epidemiology, and End Results (SEER)  
31 program. Using the International Classification of Diseases for Oncology (ICD-O-3), the  
32 morphology code details the type and behavior of a tumor.<sup>28</sup> The code contained three parts:  
33 histology or cell type (4 digits), behavior or the way it acts in the body (1 digit), and grade,  
34 differentiation or phenotype (1 digit). Histology of the primary tumor was ascertained and its  
35 behavior code were ascertained. A behavior code is defined as 0: benign; 1: uncertain whether  
36 benign or malignant; 2: carcinoma in situ; and 3 or higher: malignant (invasive) primary site.  
37 These codes were applied identically across both cohorts; the final classification of cancer by  
38 site was limited to behavior code 3 and is summarized in **Supplemental Table 1**.<sup>3</sup>  
39  
40  
41  
42  
43  
44  
45  
46  
47  
48  
49

50  
51 Cancer surveillance is currently ongoing in both cohorts. Additionally, we ascertained if women  
52 had been diagnosed with a cancer prior to the accelerometer data collection, including type of  
53 cancer and time since diagnosis. For both cohorts, deaths were reported by family members or  
54  
55  
56  
57  
58  
59  
60

1  
2  
3 postal authorities, with medical records, interviews with next of kin, and death certificates  
4  
5 obtained to confirm the event. The National Death Index was searched periodically for cohort  
6  
7 members. The underlying cause of death was classified on the basis of the death certificate,  
8  
9 medical records, and other records such as an autopsy report using the ICD 10<sup>th</sup> edition. The  
10  
11 death certificate diagnosis was used when no other records are available. In this paper, we  
12  
13 report on cancer diagnosed from study enrollment to the date of accelerometry measurement.  
14  
15

16  
17  
18 Other Measurements: Sociodemographics, including age, race/ethnicity, and education were  
19  
20 collected at study enrollment. Participants from both cohorts regularly completed mailed  
21  
22 questionnaires regarding their health history and health behaviors and we used the measure  
23  
24 closest to the time of accelerometer wear. Women reported general health, smoking status,  
25  
26 alcohol intake, and average walking speed. They also reported on postmenopausal hormone  
27  
28 use and history of diabetes, confirmed coronary heart disease, bilateral oophorectomy, and  
29  
30 hysterectomy. Height and weight were self-reported in WHS and measured in WHI/OPACH.  
31  
32 Body mass index (BMI) was calculated as weight in kilograms divided by height in meters  
33  
34 squared and defined as underweight (<18.5), normal weight (18.5-24.9), overweight (25.0-29.9),  
35  
36 or obese ( $\geq 30.0$ ).  
37  
38  
39  
40

41 Proposed Statistical Analysis: We will explore the association of physical activity and sedentary  
42  
43 behavior with cancer incidence and mortality. For site-specific cancer analyses, if participants  
44  
45 have a history of the cancer under analysis then they will be excluded. For example, if we  
46  
47 analyze lung cancer incidence then we will exclude women who already have a lung cancer  
48  
49 diagnosis prior to the accelerometer measurement. For composite cancer (a subset of cancer  
50  
51 types combined) and total cancer analyses, we will include women who have a history of cancer  
52  
53 prior to accelerometry measurement. For these analyses, we can further explore whether  
54  
55 excluding those with cancer impacts the results or whether having prior cancer is a moderator.  
56  
57  
58

1  
2  
3  
4  
5 Women with a hysterectomy prior to accelerometry measurement will be excluded from  
6 investigation of incident endometrial cancer. Similarly, women with bilateral oophorectomy prior  
7 to accelerometry measurement will be excluded from investigation of incident ovarian cancer.  
8  
9 We will use stratified Cox regression models to estimate hazard ratios and 95% confidence  
10 intervals for various measures of physical activity and sedentary behavior with cancer incidence  
11 and mortality. The stratified model allows the baseline hazards for the two cohorts to differ.<sup>29</sup>  
12  
13 However, the hazards of the exposure groups are assumed to be proportional, which will be  
14 tested using Schoenfeld residuals. We will censor follow-up time on the date of the cancer  
15 diagnosis, the date of death, or the date of last contact.  
16  
17  
18  
19  
20  
21  
22  
23  
24  
25

26 Analytic Sample: In total, 25,337 women were sent an accelerometer, with 18,289 contributing  
27 from the WHS cohort and 7048 from the WHI/OPACH cohort (**Table 1**). After excluding those  
28 that did not return the accelerometer, did not wear the accelerometer, or experienced  
29 accelerometer malfunction, 23,443 (92.5%) and 22,868 (90.3%) women contributed at least one  
30 and four adherent days of accelerometry wear, respectively, defined as wearing the device for  
31 at least 10 hours during a day while awake. WHS began as a trial for the primary prevention of  
32 cancer and cardiovascular disease; however, post-randomization, 16 women were  
33 subsequently found to have prevalent cancer and are excluded from the present study. The final  
34 sample size for the analyses was 22,852.  
35  
36  
37  
38  
39  
40  
41  
42  
43  
44  
45  
46

### 47 **Findings To Date**

48  
49 At the time of accelerometry measurement, both cohorts had a mean age above 70 years (71.5  
50 WHS, 78.7 WHI/OPACH), with a range of 62-89 years for WHS and 63-97 for WHI. Both  
51 cohorts had a mean BMI in the overweight category (26.2 WHS, 28.1 WHI/OPACH). WHS  
52 women compared to WHI/OPACH women had a higher proportion with at least some college  
53  
54  
55  
56  
57  
58



1  
2  
3 education (100% vs. 79.7%), very good or excellent general health (74.7% vs. 50.6%), drank  
4 alcohol daily (15.9% vs. 5.7%), used postmenopausal hormones (9.9% vs. 2.5%), and walked at  
5 least 3 mph (27.5% vs. 7.8%) (**Table 2**). At the time of accelerometry measurement, the  
6 WHI/OPACH women compared to WHS women included a higher proportion of Black (33.4%  
7 vs. 1.5%) and Hispanic (16.9% vs. 0.9%) women and had a higher proportion with diabetes  
8 (20.3% vs. 9.0%). The two cohorts were more similar with regards to never smoking (54.7%  
9 WHI/OPACH, 50.5% WHS), coronary heart disease (10.1% WHI/OPACH, 4.3% WHS), and  
10 cancer (11.7% WHI/OPACH, 11.9% WHS), or who reported a bilateral oophorectomy (19.2%  
11 WHI/OPACH, 22.2% WHS) or a hysterectomy (42.6% WHI/OPACH, 41.6% WHS).  
12  
13  
14  
15  
16  
17  
18  
19  
20  
21  
22  
23

24 Most women provided at least four days of adherent data (defined as 10 hours/day), with 14.9  
25 hours/day of average awake wear time (**Table 3**). The WHS women engaged in a higher mean  
26 total volume of physical activity (146 vs. 101 average daily VM/15-seconds) and accumulated  
27 more mean steps per day (5489 vs. 3573) than WHI/OPACH women. WHS women engaged in  
28 approximately 2-3 times more mean moderate-to-vigorous physical activity (91.9 vs. 50.4  
29 minutes/day) and bouts (18.2 vs. 6.4 minutes/day) than WHI/OPACH women. In contrast, mean  
30 light high and light low activity were similar. Sedentary behavior was higher among WHI/OPACH  
31 women compared to WHS women (555.6 vs. 510.6 minutes/day). It is important to note that  
32 some of the differences between cohorts may be due to age or other potential confounders,  
33 since all analyses were unadjusted for age differences.  
34  
35  
36  
37  
38  
39  
40  
41  
42  
43  
44  
45  
46

47 We examined the number of incident and fatal cancers in the cohort, with cancer outcomes  
48 documented through December 31, 2019 for WHS and through March 30, 2020 for  
49 WHI/OPACH. During an average of 5.9 (SD 1.6) years of follow-up thus far, there have been  
50 1378 cancer events among which 414 were fatal. The most common cancers were breast (459)  
51 and lung (146) cancer.  
52  
53  
54  
55  
56  
57  
58  
59  
60



### **Strengths and Limitations**

The Women's Health Accelerometry Collaboration cohort's primary strength is the statistical power to be able to address research questions regarding physical activity and sedentary behavior among older women in a cost-efficient manner by using data from existing studies. Cancer outcomes continue to be assessed annually by similar methods, adjudicated, and combined systematically across cohorts. Accelerometry was collected by the same device using similar procedures. A WHI/OPACH substudy of 200 women participated in a variety of laboratory-based activities while wearing the accelerometer and having oxygen uptake measured. Using these data, accelerometer cutpoints were developed specifically for women 60 years and older.<sup>26</sup> Raw accelerometry data will allow the research team to develop further measures of physical activity and sedentary behavior, such as using the activity index<sup>30</sup> and latent class analysis on accelerometry.<sup>31</sup> Using the raw data, we can apply two machine-learned algorithms developed specifically for older women; one designed to distinguish sitting, riding in a vehicle, standing still, standing moving, and walking,<sup>32</sup> while the other was designed to accurately quantify sitting bouts,<sup>33</sup> which, without the algorithm, are measured with substantial error.<sup>34</sup>

The Women's Health Accelerometry Collaboration cohort has several limitations. First, the accelerometer was worn once by participants for one week. It is possible that physical activity and sedentary behavior could change seasonally and over the course of follow-up, and thus not be represented by the measurement week. To address this concern, the question was explored in a subset of WHS participants that wore the accelerometer up to 3 times over a 2-3 year period, the initial measures of physical activity and sedentary behavior provided a reproducible measure at repeated time points.<sup>35</sup> Adjusting for age, season, and BMI, the intraclass correlation coefficients between women indicated moderate to high reproducibility for average

1  
2  
3 VM counts/day (0.83; 95% confidence interval 0.78, 0.87), sedentary behavior (0.73; 0.66,  
4 0.80), light activity (0.67; 0.59,0.74), and moderate-to-vigorous physical activity (0.83;  
5 0.78,0.87). This indicated that metrics derived from one week of accelerometer administration  
6 can estimate longer-term patterns of behavior among women of similar ages.  
7  
8  
9  
10

11  
12  
13 Second, there will need to be a longer follow-up period or other cohorts to address the  
14 relationships of accelerometry-assessed behaviors with rare cancers. Third, women that could  
15 not walk without assistance outside of their home were excluded due to the development of  
16 existing accelerometer algorithms on ambulation. More effort is needed to understand how to  
17 interpret accelerometry from non-ambulatory individuals in order to include them in studies of  
18 this kind.<sup>36</sup> Fourth, while WHS initially mailed accelerometers and used an awake only protocol,  
19 in contrast WHI/OPACH provided most of the accelerometers in-person at the home visit and  
20 used a 24-hour wear protocol. Despite these differences, there did not appear to be differential  
21 impact on accelerometer awake wear time between the cohorts.  
22  
23  
24  
25  
26  
27  
28  
29  
30  
31  
32  
33  
34

### 35 **Collaboration**

36 Data are accessible through the established data sharing policies for the Women's Health Study  
37 at [https://www.ncbi.nlm.nih.gov/projects/gap/cgi-bin/study.cgi?study\\_id=phs001964.v1.p1](https://www.ncbi.nlm.nih.gov/projects/gap/cgi-bin/study.cgi?study_id=phs001964.v1.p1) and  
38 <http://whs.bwh.harvard.edu/> . Similarly, data are accessible through the established data sharing  
39 policies for the Women's Health Initiative at <https://www.whi.org/page/working-with-whi-data>.  
40 Interested researchers can write to the study to clarify data access. Due to data sharing  
41 agreements, the Women's Health Accelerometry Collaboration data are not directly available.  
42  
43  
44  
45  
46  
47  
48  
49  
50

51 **Acknowledgments**: The authors thank Chris Moore and Fang Wen for analytic support, and  
52 Steve Moore for assistance with the cancer outcome coding. We acknowledge the WHI  
53  
54  
55  
56  
57  
58  
59  
60

investigators listed at the following link: <https://www-who-org.s3.us-west-2.amazonaws.com/wp-content/uploads/WHI-Investigator-Short-List.pdf>.

**Contributors:** IL, EJS, and RD were involved in study design, accelerometry acquisition, and/or analysis of the WHS. AL, KRE, IL, CD, and JB were involved in the study design, accelerometry acquisition, and/or analysis for the WHI/OPACH Study. KRE, along with the research team, secured funding for this project. KRE conceived of and drafted the manuscript, and GW helped with data analysis. All authors reviewed the manuscript critically and approved the final version.

**Funding:** The study was supported by the National Institutes of Health (NIH) 5R01CA227122: National Cancer Institute, Office of the Director, Office of Disease Prevention, and Office of Behavioral and Social Sciences Research. WHS is funded by NIH grants CA154647, CA047988, CA182913, HL043851, HL080467, and HL099355. The WHI program is funded by NIH, National Heart, Lung, and Blood Institute (NHLBI) #75N92021D00001, 75N92021D00002, 75N92021D00003, 75N92021D00004, 75N92021D00005, and grant R01HL105065. Dr. Cuthbertson was supported by a NHLBI National Research Service Award (T32-HL007055). Dr. Parada was supported by the National Cancer Institute (K01 CA234317), the SDSU/UCSD Comprehensive Cancer Center Partnership (U54 CA132384 & U54 CA132379), and the Alzheimer's Disease Resource Center for Advancing Minority Aging Research at the University of California San Diego (P30 AG059299). Dr. Shiroma was supported by the Intramural Research Program at the NIH National Institute on Aging. The content is solely the responsibility of the authors and does not necessarily represent the official views of the NIH.

**Competing interests:** None declared

**Patient consent for publication:** Not required

1  
2  
3  
4  
5 **Ethics approval:** All study procedures were reviewed and approved by the University of North  
6 Carolina Institutional Review Boards at the University of North Carolina, Mass General Brigham,  
7 and the University of California – San Diego.  
8  
9  
10

11  
12  
13  
14 **Provenance and peer review:** Not commissioned; externally peer reviewed.  
15

16  
17  
18 **Data availability statement:** Data are available for the Women's Health Study at  
19 [https://www.ncbi.nlm.nih.gov/projects/gap/cgi-bin/study.cgi?study\\_id=phs001964.v1.p1](https://www.ncbi.nlm.nih.gov/projects/gap/cgi-bin/study.cgi?study_id=phs001964.v1.p1) and for  
20 the Women's Health Initiative OPACH Study at <https://www.whi.org/page/working-with-ghi-data>.  
21  
22 Researchers using the data are required to follow the terms designed to protect the privacy of  
23 the participants.  
24  
25  
26  
27

28  
29  
30 **Open access:** This is an open access article distributed in accordance with the Creative  
31 Commons Attribution Non Commercial (CC BY-NC 4.0) license, which permits others to  
32 distribute, remix, adapt, build upon this work non-commercially, and license their derivative  
33 works on different terms, provided the original work is properly cited, appropriate credit is given,  
34 any changes made indicated, and the use is non-commercial. See  
35 <http://creativecommons.org/licenses/by-nc/4.0/>.  
36  
37  
38  
39  
40  
41  
42  
43

44  
45 **ORCID:**

46 Kelly Evenson <https://orcid.org/0000-0002-3720-5830>

47 John Bellettiere <https://orcid.org/0000-0002-7167-3048>

48 Carmen Cuthbertson <https://orcid.org/0000-0001-5145-9098>

49 Chongzhi Di <http://orcid.org/0000-0002-1371-581X>

50 Annie Green Howard <https://orcid.org/0000-0003-0837-8166>  
51  
52  
53  
54  
55  
56  
57  
58

1  
2  
3 Andrea LaCroix <https://orcid.org/0000-0002-9532-976X>

4  
5 I-Min Lee <https://orcid.org/0000-0002-1083-6907>

6  
7 Humberto Parada <https://orcid.org/0000-0001-6562-8577>

8  
9 Benjamin Schumacher <https://orcid.org/0000-0002-3099-3387>

10  
11 Eric J Shiroma <http://orcid.org/0000-0003-4920-2642>

12  
13 Guangxing Wang <https://orcid.org/0000-0002-4722-3127>

14  
15  
16  
17  
18  
19  
20  
21  
22  
23  
24  
25  
26  
27  
28  
29  
30  
31  
32  
33  
34  
35  
36  
37  
38  
39  
40  
41  
42  
43  
44  
45  
46  
47  
48  
49  
50  
51  
52  
53  
54  
55  
56  
57  
58  
59  
60

For peer review only

## References

1. American Cancer Society. *Cancer Facts and Figures 2021*. Accessed at <https://www.cancer.org/research/cancer-facts-statistics/all-cancer-facts-figures/cancer-facts-figures-2021.html>. Atlanta, Georgia; 2021. Page 1-67.
2. American Cancer Society. *Cancer Facts and Figures, 2019. Cancer in the Oldest Old*. Accessed at <https://www.cancer.org/research/cancer-facts-statistics/all-cancer-facts-figures/cancer-facts-figures-2019.html>. Atlanta, Georgia;2019. Page 29-43.
3. Moore SC, Lee IM, Weiderpass E, et al. Association of Leisure-Time physical activity with risk of 26 types of cancer in 1.44 million adults. *JAMA Intern Med*. 2016;176(6):816-25.
4. 2018 Physical Activity Guidelines Advisory Committee. *2018 Physical Activity Guidelines Advisory Committee Scientific Report*. Accessed at <https://health.gov/paguidelines/second-edition/report.aspx>. Washington, DC: Department of Health and Human Services; 2018.
5. McTiernan A, Friedenreich CM, Katzmarzyk PT, et al. Physical activity in cancer prevention and survival: a systematic review. *Med Sci Sports Exercise*. 2019;51(6):1252-61.
6. Katzmarzyk PT, Powell KE, Jakicic JM, et al. Sedentary behavior and health: update from the 2018 Physical Activity Guidelines Advisory Committee. *Med Sci Sports Exerc*. 2019;51(6):1227-41.
7. Chastin SFM, De Craemer M, De Cocker K, et al. How does light-intensity physical activity associate with adult cardiometabolic health and mortality? Systematic review with meta-analysis of experimental and observational studies. *Br J Sports Med*. 2019;53(6):370-6.

- 1
  - 2
  - 3
  - 4
  - 5
  - 6
  - 7
  - 8
  - 9
  - 10
  - 11
  - 12
  - 13
  - 14
  - 15
  - 16
  - 17
  - 18
  - 19
  - 20
  - 21
  - 22
  - 23
  - 24
  - 25
  - 26
  - 27
  - 28
  - 29
  - 30
  - 31
  - 32
  - 33
  - 34
  - 35
  - 36
  - 37
  - 38
  - 39
  - 40
  - 41
  - 42
  - 43
  - 44
  - 45
  - 46
  - 47
  - 48
  - 49
  - 50
  - 51
  - 52
  - 53
  - 54
  - 55
  - 56
  - 57
  - 58
  - 59
  - 60
8. Fuzeki E, Engeroff T, Banzer W. Health benefits of light-intensity physical activity: a systematic review of accelerometer data of the National Health and Nutrition Examination Survey (NHANES). *Sport Med.* 2017;47(9):1769-93.
9. Dempsey PC, Strain T, Khaw KT, et al. Prospective associations of accelerometer-measured physical activity and sedentary time with incident cardiovascular disease, cancer, and all-cause mortality. *Circ.* 2020;141(13):1113-5.
10. Ensrud KE, Blackwell TL, Cauley JA, et al. Objective measures of activity level and mortality in older men. *J Am Geriatr Soc.* 2014;62(11):2079-87.
11. Gilchrist SC, Howard VJ, Akinyemiju T, et al. Association of sedentary behavior with cancer mortality in middle-aged and older US adults. *JAMA Oncol.* 2020;6(8):1210-7.
12. Parada H, Jr., McDonald E, Bellettiere J, et al. Associations of accelerometer-measured physical activity and physical activity-related cancer incidence in older women: results from the WHI OPACH Study. *Br J Cancer.* 2020;122(9):1409-16.
13. Cook NR, Lee IM, Gaziano JM, et al. Low-dose aspirin in the primary prevention of cancer: the Women's Health Study: a randomized controlled trial. *JAMA.* 2005;294(1):47-55.
14. Lee IM, Cook NR, Gaziano JM, et al. Vitamin E in the primary prevention of cardiovascular disease and cancer: the Women's Health Study: a randomized controlled trial. *JAMA.* 2005;294(1):56-65.
15. Ridker PM, Cook NR, Lee IM, et al. A randomized trial of low-dose aspirin in the primary prevention of cardiovascular disease in women. *New Engl J Med.* 2005;352(13):1293-1304.
16. Lee IM, Shiroma EJ, Evenson KR, et al. Using devices to assess physical activity and sedentary behavior in a large cohort study, the Women's Health Study. *J Measure Physical Behav.* 2018;1(2):60-9.

17. LaCroix AZ, Rillamas-Sun E, Buchner D, et al. The Objective Physical Activity and Cardiovascular Disease Health in Older Women (OPACH) Study. *BMC Public Health*. 2017;17(1):192.
18. Women's Health Initiative. Long Life Study (W64). [online]. Accessed at <https://sp.whi.org/studies/SitePages/Long%20Life%20Study.aspx>. 2021.
19. LaMonte MJ, Buchner DM, Rillamas-Sun E, et al. Accelerometer-measured physical activity and mortality in women aged 63 to 99. *J Am Geriatr Soc*. 2018;66(5):886-94.
20. Buchner DM, Rillamas-Sun E, Di C, et al. Accelerometer-measured moderate to vigorous physical activity and incidence rates of falls in older women. *J Am Geriatr Soc*. 2017;65(11):2480-7.
21. Bellettiere J, LaMonte MJ, Evenson KR, et al. Sedentary behavior and cardiovascular disease in older women: The Objective Physical Activity and Cardiovascular Health (OPACH) Study. *Circ*. 2019;139(8):1036-46.
22. LaCroix AZ, Bellettiere J, Rillamas-Sun E, et al. Association of light physical activity measured by accelerometry and incidence of coronary heart disease and cardiovascular disease in older women. *JAMA Network Open*. 2019;2(3):e190419.
23. Rillamas-Sun E, Buchner DM, Di C, et al. Development and application of an automated algorithm to identify a window of consecutive days of accelerometer wear for large-scale studies. *BMC Res Notes*. 2015;8:270.
24. Choi L, Ward SC, Schnelle JF, et al. Assessment of wear/nonwear time classification algorithms for triaxial accelerometer. *Med Sci Sports Exerc*. 2012;44(10):2009-16.
25. Choi L, Liu Z, Matthews CE, Buchowski MS. Validation of accelerometer wear and nonwear time classification algorithm. *Med Sci Sports Exerc*. 2011;43(2):357-64.
26. Evenson K, Wen F, Herring A, et al. Calibrating physical activity intensity for hip-worn accelerometry in women  $\geq 60$  years. *Prev Med Rep*. 2015;2:750-6.



- 1  
2  
3 27. Curb JD, McTiernan A, Heckbert SR, et al. Outcomes ascertainment and adjudication  
4 methods in the Women's Health Initiative. *Ann Epidemiol*. 2003;13(9 Suppl):S122-8.  
5  
6  
7 28. World Health Organization. *International Classification of Diseases for Oncology*.  
8  
9 Accessed at  
10  
11 [https://apps.who.int/iris/bitstream/handle/10665/96612/9789241548496\\_eng.pdf](https://apps.who.int/iris/bitstream/handle/10665/96612/9789241548496_eng.pdf). Malta:  
12 World Health Organization; 2013.  
13  
14  
15 29. de Jong VMT, Moons KGM, Riley RD, et al. Individual participant data meta-analysis of  
16 intervention studies with time-to-event outcomes: a review of the methodology and an  
17 applied example. *Res Synth Methods*. 2020;11(2):148-68.  
18  
19  
20 30. Bai J, Di C, Xiao L, et al. An activity index for raw accelerometry data and its comparison  
21 with other activity metrics. *PLoS One*. 2016;11(8):e0160644.  
22  
23  
24 31. Evenson KR, Wen F, Metzger JS, et al. Physical activity and sedentary behavior  
25 patterns using accelerometry from a national sample of United States adults. *Intl J*  
26 *Behavior Nutr Physical Activity*. 2015;12(1):20.  
27  
28  
29 32. Rosenberg D, Godbole S, Ellis K, et al. Classifiers for accelerometer-measured  
30 behaviors in older women. *Med Sci Sports Exerc*. 2017;49(3):610-616.  
31  
32  
33 33. Nakandala S, Jankowska M, Tuz-Zahra F, et al. Application of convolutional neural  
34 network algorithms for advancing sedentary and activity bout classification. *J Measure*  
35 *Physical Behaviour*. 2021;4:in press.  
36  
37  
38 34. Bellettiere J, Tuz-Zahra F, Carlson J, et al. Agreement of sedentary behavior metrics  
39 derived from hip- and thigh-worn accelerometers among older adults: with implications  
40 for studying physical and cognitive health. *J Measure Physical Behaviour*. 2021;4:79-88.  
41  
42  
43 35. Keadle SK, Shiroma EJ, Kamada M, et al. Reproducibility of accelerometer-assessed  
44 physical activity and sedentary time. *Am J Prev Med*. 2017;52(4):541-8.  
45  
46  
47  
48  
49  
50  
51  
52  
53  
54  
55  
56  
57  
58  
59  
60

- 1  
2  
3 36. Gurwitz J, Carlozzi N, Davison K, et al. National Institutes of Health Pathways to  
4  
5 Prevention Workshop: physical activity and health for wheelchair users. *Ann Intern Med*.  
6  
7 2021:in press.  
8  
9  
10  
11  
12  
13  
14  
15  
16  
17  
18  
19  
20  
21  
22  
23  
24  
25  
26  
27  
28  
29  
30  
31  
32  
33  
34  
35  
36  
37  
38  
39  
40  
41  
42  
43  
44  
45  
46  
47  
48  
49  
50  
51  
52  
53  
54  
55  
56  
57  
58  
59  
60

For peer review only

Table 1: Accelerometer wear overall and by cohort

|                                                      | Total  | WHS<br>n | WHI/OPACH<br>n |
|------------------------------------------------------|--------|----------|----------------|
| Sample invited to sub-study                          | 38,746 | 29,494   | 9252           |
| Agreed to participate and sent the accelerometer     | 25,337 | 18,289   | 7048           |
| Returned accelerometer                               | 24,429 | 17,708   | 6721           |
| Data were downloaded                                 | 23,955 | 17,466   | 6489           |
| At least one adherent day of wear ( $\geq 10$ hours) | 23,443 | 17,061   | 6382           |
| Adherent wear $\geq 4$ days of $\geq 10$ hours/day   | 22,868 | 16,742   | 6126           |
| Removed those with cancer at trial inception*        | 22,852 | 16,726   | 6126           |

\*WHS began as a trial for the primary prevention of cancer and cardiovascular disease; however, post-randomization, 16 of the 16,742 women were subsequently found to have prevalent cancer and were excluded from the present study.

Table 2: Description of sample overall and by cohort

|                                                                 | Overall (n=22,852) |       | WHS (n=16,726) |       | Missing | WHI/OPACH (n=6126) |      | Missing |
|-----------------------------------------------------------------|--------------------|-------|----------------|-------|---------|--------------------|------|---------|
|                                                                 | Mean               | SD    | Mean           | SD    |         | Mean               | SD   |         |
| Age, years                                                      | 73.4               | 6.8   | 71.5           | 5.7   | 0       | 78.7               | 6.7  | 0       |
| Body mass index, kg/m <sup>2</sup>                              | 26.7               | 5.3   | 26.2           | 5.0   | 3       | 28.1               | 5.7  | 386     |
|                                                                 | Percent            | n     | Percent        | n     | Missing | Percent            | n    | Missing |
| <u>Sociodemographic</u>                                         |                    |       |                |       |         |                    |      |         |
| <u>Age categories</u>                                           |                    |       |                |       |         |                    |      |         |
| 60-69                                                           | 35.1               | 8019  | 44.2           | 7392  |         | 10.2               | 627  | 0       |
| 70-79                                                           | 43.8               | 10013 | 45.2           | 7565  |         | 40.0               | 2448 |         |
| 80-89                                                           | 20.0               | 4563  | 10.6           | 1769  |         | 45.6               | 2794 |         |
| >=90                                                            | 1.1                | 257   | 0.0            | 0     |         | 4.2                | 257  |         |
| <u>Race/ethnicity</u>                                           |                    |       |                |       |         |                    |      |         |
| White                                                           | 83.1               | 18984 | 95.3           | 15938 | 0       | 49.7               | 3046 | 0       |
| Black                                                           | 10.1               | 2300  | 1.5            | 253   |         | 33.4               | 2047 |         |
| Hispanic                                                        | 5.2                | 1184  | 0.9            | 151   |         | 16.9               | 1033 |         |
| Unknown or other                                                | 1.7                | 384   | 2.3            | 384   |         | 0.0                | 0    |         |
| <u>Education</u>                                                |                    |       |                |       |         |                    |      |         |
| High school or less                                             | 5.5                | 1237  | 0.0            | 0     | 269     | 20.3               | 1237 | 41      |
| Some college                                                    | 46.7               | 10531 | 49.7           | 8182  |         | 38.6               | 2349 |         |
| College graduate or more                                        | 47.8               | 10774 | 50.3           | 8275  |         | 41.1               | 2499 |         |
| <u>Self-reported or measured near accelerometry measurement</u> |                    |       |                |       |         |                    |      |         |
| <u>General health</u>                                           |                    |       |                |       |         |                    |      |         |
| Excellent                                                       | 20.7               | 4730  | 24.6           | 4115  | 5       | 10.1               | 615  | 21      |

1  
2  
3  
4  
5  
6  
7  
8  
9  
10  
11  
12  
13  
14  
15  
16  
17  
18  
19  
20  
21  
22  
23  
24  
25  
26  
27  
28  
29  
30  
31  
32  
33  
34  
35  
36  
37  
38  
39  
40  
41  
42  
43  
44  
45  
46  
47

|                                   |      |       |      |      |      |      |
|-----------------------------------|------|-------|------|------|------|------|
| Very good                         | 47.5 | 10842 | 50.1 | 8371 | 40.5 | 2471 |
| Good                              | 27.3 | 6230  | 22.8 | 3804 | 39.7 | 2426 |
| Fair or poor                      | 4.5  | 1024  | 2.6  | 431  | 9.7  | 593  |
| Body mass index                   |      |       |      |      | 3    | 386  |
| <18.5                             | 1.8  | 415   | 2.0  | 334  | 1.3  | 81   |
| 18.5-24.9                         | 39.2 | 8953  | 43.1 | 7215 | 28.4 | 1738 |
| 25.0-29.9                         | 33.6 | 7672  | 33.6 | 5624 | 33.4 | 2048 |
| 30.0-34.9                         | 14.7 | 3356  | 13.5 | 2263 | 17.8 | 1093 |
| 35.0-39.9                         | 5.0  | 1145  | 4.1  | 692  | 7.4  | 453  |
| >=40                              | 2.1  | 486   | 1.6  | 261  | 3.7  | 225  |
| Smoking                           |      |       |      |      | 1    | 582  |
| Current                           | 3.4  | 749   | 3.5  | 590  | 2.9  | 159  |
| Former                            | 45.1 | 10046 | 46.0 | 7695 | 42.4 | 2351 |
| Never                             | 51.5 | 11474 | 50.5 | 8440 | 54.7 | 3034 |
| Alcohol                           |      |       |      |      | 7    | 536  |
| Never or rarely                   | 37.9 | 8445  | 38.0 | 6356 | 37.4 | 2089 |
| Monthly                           | 15.9 | 3558  | 9.8  | 1646 | 34.2 | 1912 |
| Weekly                            | 32.9 | 7340  | 36.3 | 6069 | 22.7 | 1271 |
| Daily                             | 13.3 | 2966  | 15.9 | 2648 | 5.7  | 318  |
| Walking speed                     |      |       |      |      | 4    | 261  |
| <2 mph                            | 21.5 | 4906  | 17.5 | 2931 | 32.2 | 1975 |
| 2-2.9 mph                         | 40.2 | 9185  | 42.7 | 7143 | 33.3 | 2042 |
| 3-3.9 mph                         | 20.7 | 4728  | 25.5 | 4271 | 7.5  | 457  |
| >=4 mph                           | 1.5  | 350   | 2.0  | 332  | 0.3  | 18   |
| Unsure or does not walk regularly | 15.0 | 3418  | 12.2 | 2045 | 22.4 | 1373 |

For peer review only

1  
2  
3  
4 Medical history near accelerometry measurement

5 Using postmenopausal hormones 6 0

6 Yes 7.9 1812 9.9 1657 2.5 155

7

8 Diabetes history 0 0

9 Yes 12.0 2747 9.0 1501 20.3 1246

10

11 Coronary heart disease 0 0

12 Yes 5.8 1328 4.3 712 10.1 616

13

14 Oophorectomy, bilateral 0 94

15 Yes 21.4 4873 22.2 3718 19.2 1155

16

17 Hysterectomy 0 0

18 Yes 41.9 9568 41.6 6957 42.6 2611

19

20 Cancer at accelerometry measurement 0 0

21 Yes 11.8 2696 11.9 1982 11.7 714

22

23

24

25

26

27

28

29

30

31

32

33

34

35

36

37

38

39

40

41

42

43

44

45

46

47

---

Table 3: Description of accelerometry measures overall and by cohort

|                                               | Overall<br>(n=22,852) |        | WHS (n=16,726) |        | WHI/OPACH<br>(n=6126) |        |
|-----------------------------------------------|-----------------------|--------|----------------|--------|-----------------------|--------|
|                                               | Mean                  | SD     | Mean           | SD     | Mean                  | SD     |
| Wear time on adherent days, hours/day         | 14.9                  | 1.3    | 14.9           | 1.3    | 14.9                  | 1.3    |
| Average daily vector magnitude per 15-seconds | 134.0                 | 53.9   | 146.0          | 52.8   | 101.2                 | 42.1   |
| Average daily steps/day                       | 4975.9                | 2668.8 | 5489.4         | 2658.2 | 3573.1                | 2142.3 |
| Average minutes/day using vector magnitude:   |                       |        |                |        |                       |        |
| Sedentary behavior                            | 522.7                 | 101.0  | 510.6          | 98.8   | 555.6                 | 99.4   |
| Light low                                     | 182.1                 | 46.1   | 179.6          | 44.2   | 188.9                 | 50.2   |
| Light high                                    | 105.5                 | 33.3   | 108.2          | 32.1   | 98.0                  | 35.5   |
| Moderate to vigorous                          | 80.8                  | 46.5   | 91.9           | 45.4   | 50.4                  | 34.4   |
| Moderate to vigorous bouts                    | 15.0                  | 22.8   | 18.2           | 24.6   | 6.4                   | 13.6   |

Supplemental Table 1: International Classification of Diseases for Oncology, 3rd Ed. Codes for each cancer site used in ascertainment of primary incident invasive cancers across cohorts. This coding was developed from Moore et al.<sup>3</sup>

| Cancer site                  | ICD-O-3 codes and, if applicable, ICD-O-3 histology <sup>†</sup>                                                                                                                                                                                                                                                                     |
|------------------------------|--------------------------------------------------------------------------------------------------------------------------------------------------------------------------------------------------------------------------------------------------------------------------------------------------------------------------------------|
| Esophageal adenocarcinoma    | C150-159& histologies: 8140, 8142, 8144, 8261, 8310, 8480, 8481, 8570                                                                                                                                                                                                                                                                |
| Gallbladder                  | C239                                                                                                                                                                                                                                                                                                                                 |
| Liver*                       | C220 and C221                                                                                                                                                                                                                                                                                                                        |
| Lung                         | C340-C349                                                                                                                                                                                                                                                                                                                            |
| Kidney                       | C649 and C659                                                                                                                                                                                                                                                                                                                        |
| Small intestine              | C170-179                                                                                                                                                                                                                                                                                                                             |
| Gastric cardia               | C160                                                                                                                                                                                                                                                                                                                                 |
| Endometrial                  | C540-C549 and C559                                                                                                                                                                                                                                                                                                                   |
| Esophageal squamous          | C150-159 and histologies 8041, 8070-8072, 8074                                                                                                                                                                                                                                                                                       |
| Myeloid leukemia             | Acute myeloid leukemia: any histology of 9840, 9861, 9865-9867, 9869, 9871-9874, 9895-9898, 9910-9911, 9920<br>Acute monocytic leukemia: any histology of 9891<br>Chronic myeloid leukemia: any histology of 9863, 9875-9876, 9945-9946<br>Other myeloid/monocytic leukemia: any histology of 9860, 9930                             |
| Myeloma                      | Any histology of 9731-9732, 9734                                                                                                                                                                                                                                                                                                     |
| Colon                        | C180-C189, C260                                                                                                                                                                                                                                                                                                                      |
| Head and neck                | Lip: C000-C009<br>Tongue: C019-C029<br>Salivary gland: C079-C089<br>Floor of mouth: C040-C049<br>Gum and other mouth: C030-C039, C050-C059, C060-C069<br>Nasopharynx: C110-C119<br>Tonsil: C090-C099<br>Oropharynx: C100-C109<br>Hypopharynx: C129, C30-C139<br>Other oral cavity and pharynx: C140, C142, C148<br>Larynx: C320-C329 |
| Rectum                       | C199, C209                                                                                                                                                                                                                                                                                                                           |
| Bladder                      | C670-C679                                                                                                                                                                                                                                                                                                                            |
| Breast                       | C500-C509                                                                                                                                                                                                                                                                                                                            |
| Non-Hodgkin's Lymphoma (NHL) | NHL-nodal: C024, C098, C099, C111, C142, C379, C422, C770-C779 and histologies: 9590-9597, 9670-9671, 9673, 9675, 9678-9680, 9684,                                                                                                                                                                                                   |



|                                           |                                                                                                                                                                                                                                                                                                                       |
|-------------------------------------------|-----------------------------------------------------------------------------------------------------------------------------------------------------------------------------------------------------------------------------------------------------------------------------------------------------------------------|
|                                           | 9687-9691, 9695, 9698-9702, 9705, 9708, 9709, 9712, 9714-9719, 9724-9729, 9735, 9737, 9738, 9811-9818, 9823, 9827, 9837                                                                                                                                                                                               |
|                                           | NHL-extranodal, definition 1: All sites except C024, C098-C099, C111, C142, C379, C422, C770-C779 and histologies of: 9590-9597, 9670-9671, 9673, 9675, 9678-9680, 9684, 9687, 9688, 9689-9691, 9695, 9698-9702, 9705, 9708, 9709, 9712, 9714-9719, 9724-9729, 9735, 9737, 9738                                       |
|                                           | NHL-extranodal, definition 2: All sites except C024, C098, C099, C111, C142, C379, C420-C422, C424, C770-C779 and histologies of: 9811-9818, 9823, 9827, 9837                                                                                                                                                         |
| Thyroid                                   | C739                                                                                                                                                                                                                                                                                                                  |
| Gastric non-cardia                        | C161-169                                                                                                                                                                                                                                                                                                              |
| Soft tissue                               | C380, C470-C479, C490-C499                                                                                                                                                                                                                                                                                            |
| Pancreas                                  | C250-C259                                                                                                                                                                                                                                                                                                             |
| Lymphocytic leukemia                      | Acute lymphocytic leukemia, definition 1: Any histology of 9826, 9835-9836<br>Acute lymphocytic leukemia, definition 2: C420, C421, C424 and histologies: 9811-9818, 9837<br>Chronic lymphocytic leukemia: C420, C421, C424 and histology 9823<br>Other lymphocytic leukemia: Any histology of 9820, 9832-9834, 9940. |
| Ovary                                     | C569                                                                                                                                                                                                                                                                                                                  |
| Brain                                     | C710-C719                                                                                                                                                                                                                                                                                                             |
| Prostate†                                 | C619                                                                                                                                                                                                                                                                                                                  |
| Skin cancer, excluding basal and squamous | Melanoma: C440-C449 and histologies 8720-8790<br>Other non-epithelial skin: C440-C449, excluding histologies 8000-8005, 8010-8046, 8050-8084, 8090-8110, 8720-8790, 9050-9055, 9140, 9590-9992                                                                                                                        |

\* A small proportion of the liver cancer classification consists of intrahepatic bile duct cancer cases.

† A small proportion of the kidney cancer classification consists of renal pelvis cancer cases.

‡ Unless otherwise stated, cancer definitions exclude the histologies 9050-9055, 9140, and 9590-9992.

STROBE Statement—Checklist of items that should be included in reports of *cohort studies*

|                              | Item No | Recommendation                                                                                                                                                                                                                                                                                                         | Page No |
|------------------------------|---------|------------------------------------------------------------------------------------------------------------------------------------------------------------------------------------------------------------------------------------------------------------------------------------------------------------------------|---------|
| <b>Title and abstract</b>    | 1       | (a) Indicate the study's design with a commonly used term in the title or the abstract<br>(b) Provide in the abstract an informative and balanced summary of what was done and what was found                                                                                                                          | 3       |
| <b>Introduction</b>          |         |                                                                                                                                                                                                                                                                                                                        |         |
| Background/rationale         | 2       | Explain the scientific background and rationale for the investigation being reported                                                                                                                                                                                                                                   | 4       |
| Objectives                   | 3       | State specific objectives, including any prespecified hypotheses                                                                                                                                                                                                                                                       | 5       |
| <b>Methods</b>               |         |                                                                                                                                                                                                                                                                                                                        |         |
| Study design                 | 4       | Present key elements of study design early in the paper                                                                                                                                                                                                                                                                | 6       |
| Setting                      | 5       | Describe the setting, locations, and relevant dates, including periods of recruitment, exposure, follow-up, and data collection                                                                                                                                                                                        | 6       |
| Participants                 | 6       | (a) Give the eligibility criteria, and the sources and methods of selection of participants. Describe methods of follow-up<br>(b) For matched studies, give matching criteria and number of exposed and unexposed                                                                                                      | 6       |
| Variables                    | 7       | Clearly define all outcomes, exposures, predictors, potential confounders, and effect modifiers. Give diagnostic criteria, if applicable                                                                                                                                                                               | 8       |
| Data sources/<br>measurement | 8*      | For each variable of interest, give sources of data and details of methods of assessment (measurement). Describe comparability of assessment methods if there is more than one group                                                                                                                                   | 7-10    |
| Bias                         | 9       | Describe any efforts to address potential sources of bias                                                                                                                                                                                                                                                              | n/a     |
| Study size                   | 10      | Explain how the study size was arrived at                                                                                                                                                                                                                                                                              | 11      |
| Quantitative variables       | 11      | Explain how quantitative variables were handled in the analyses. If applicable, describe which groupings were chosen and why                                                                                                                                                                                           | 10-11   |
| Statistical methods          | 12      | (a) Describe all statistical methods, including those used to control for confounding<br>(b) Describe any methods used to examine subgroups and interactions<br>(c) Explain how missing data were addressed<br>(d) If applicable, explain how loss to follow-up was addressed<br>(e) Describe any sensitivity analyses | 10-11   |
| <b>Results</b>               |         |                                                                                                                                                                                                                                                                                                                        |         |
| Participants                 | 13*     | (a) Report numbers of individuals at each stage of study—eg numbers potentially eligible, examined for eligibility, confirmed eligible, included in the study, completing follow-up, and analysed<br>(b) Give reasons for non-participation at each stage<br>(c) Consider use of a flow diagram                        | 11      |
| Descriptive data             | 14*     | (a) Give characteristics of study participants (eg demographic, clinical, social) and information on exposures and potential confounders<br>(b) Indicate number of participants with missing data for each variable of interest<br>(c) Summarise follow-up time (eg, average and total amount)                         | 12      |
| Outcome data                 | 15*     | Report numbers of outcome events or summary measures over time                                                                                                                                                                                                                                                         | na      |

|    |                          |    |                                                                                                                                                                                                              |       |
|----|--------------------------|----|--------------------------------------------------------------------------------------------------------------------------------------------------------------------------------------------------------------|-------|
| 1  | Main results             | 16 | (a) Give unadjusted estimates and, if applicable, confounder-adjusted estimates and their precision (eg, 95% confidence interval). Make clear which confounders were adjusted for and why they were included | na    |
| 2  |                          |    | (b) Report category boundaries when continuous variables were categorized                                                                                                                                    |       |
| 3  |                          |    | (c) If relevant, consider translating estimates of relative risk into absolute risk for a meaningful time period                                                                                             |       |
| 4  |                          |    |                                                                                                                                                                                                              |       |
| 5  |                          |    |                                                                                                                                                                                                              |       |
| 6  |                          |    |                                                                                                                                                                                                              |       |
| 7  |                          |    |                                                                                                                                                                                                              |       |
| 8  |                          |    |                                                                                                                                                                                                              |       |
| 9  | Other analyses           | 17 | Report other analyses done—eg analyses of subgroups and interactions, and sensitivity analyses                                                                                                               | na    |
| 10 |                          |    |                                                                                                                                                                                                              |       |
| 11 | <b>Discussion</b>        |    |                                                                                                                                                                                                              |       |
| 12 |                          |    |                                                                                                                                                                                                              |       |
| 13 | Key results              | 18 | Summarise key results with reference to study objectives                                                                                                                                                     | na    |
| 14 | Limitations              | 19 | Discuss limitations of the study, taking into account sources of potential bias or imprecision. Discuss both direction and magnitude of any potential bias                                                   | 13-14 |
| 15 |                          |    |                                                                                                                                                                                                              |       |
| 16 | Interpretation           | 20 | Give a cautious overall interpretation of results considering objectives, limitations, multiplicity of analyses, results from similar studies, and other relevant evidence                                   | 13-14 |
| 17 |                          |    |                                                                                                                                                                                                              |       |
| 18 |                          |    |                                                                                                                                                                                                              |       |
| 19 | Generalisability         | 21 | Discuss the generalisability (external validity) of the study results                                                                                                                                        | 13-14 |
| 20 |                          |    |                                                                                                                                                                                                              |       |
| 21 | <b>Other information</b> |    |                                                                                                                                                                                                              |       |
| 22 |                          |    |                                                                                                                                                                                                              |       |
| 23 | Funding                  | 22 | Give the source of funding and the role of the funders for the present study and, if applicable, for the original study on which the present article is based                                                | 15-16 |
| 24 |                          |    |                                                                                                                                                                                                              |       |
| 25 |                          |    |                                                                                                                                                                                                              |       |

26 \*Give information separately for exposed and unexposed groups.

27  
28  
29 **Note:** An Explanation and Elaboration article discusses each checklist item and gives methodological background and published examples of transparent reporting. The STROBE checklist is best used in conjunction with this article (freely available on the Web sites of PLoS Medicine at <http://www.plosmedicine.org/>, Annals of Internal Medicine at <http://www.annals.org/>, and Epidemiology at <http://www.epidem.com/>). Information on the STROBE Initiative is available at <http://www.strobe-statement.org>.

30  
31  
32  
33  
34  
35  
36  
37  
38  
39  
40  
41  
42  
43  
44  
45  
46  
47  
48  
49  
50  
51  
52  
53  
54  
55  
56  
57  
58  
59  
60

# BMJ Open

## Cohort Profile: The Women's Health Accelerometry Collaboration

|                                 |                                                                                                                                                                                                                                                                                                                                                                                                                                                                                                                                                                                                                                                                                                                                                                                                                                                                                                                                                                                                                                                                                                                                                       |
|---------------------------------|-------------------------------------------------------------------------------------------------------------------------------------------------------------------------------------------------------------------------------------------------------------------------------------------------------------------------------------------------------------------------------------------------------------------------------------------------------------------------------------------------------------------------------------------------------------------------------------------------------------------------------------------------------------------------------------------------------------------------------------------------------------------------------------------------------------------------------------------------------------------------------------------------------------------------------------------------------------------------------------------------------------------------------------------------------------------------------------------------------------------------------------------------------|
| Journal:                        | <i>BMJ Open</i>                                                                                                                                                                                                                                                                                                                                                                                                                                                                                                                                                                                                                                                                                                                                                                                                                                                                                                                                                                                                                                                                                                                                       |
| Manuscript ID                   | bmjopen-2021-052038.R1                                                                                                                                                                                                                                                                                                                                                                                                                                                                                                                                                                                                                                                                                                                                                                                                                                                                                                                                                                                                                                                                                                                                |
| Article Type:                   | Cohort profile                                                                                                                                                                                                                                                                                                                                                                                                                                                                                                                                                                                                                                                                                                                                                                                                                                                                                                                                                                                                                                                                                                                                        |
| Date Submitted by the Author:   | 01-Sep-2021                                                                                                                                                                                                                                                                                                                                                                                                                                                                                                                                                                                                                                                                                                                                                                                                                                                                                                                                                                                                                                                                                                                                           |
| Complete List of Authors:       | <p>Evenson, Kelly; University of North Carolina at Chapel Hill Gillings School of Global Public Health, Department of Epidemiology<br/>         Bellettiere, John; University of California San Diego<br/>         Cuthbertson, Carmen ; University of North Carolina at Chapel Hill Gillings School of Global Public Health, Department of Epidemiology<br/>         Di, Chongzhi; Fred Hutchinson Cancer Research Center<br/>         Dushkes, Rimma; Brigham and Women's Hospital, Department of Preventive Medicine<br/>         Howard, Annie; University of North Carolina at Chapel Hill Gillings School of Global Public Health, Department of Biostatistics<br/>         Parada, Humberto; San Diego State University; University of California San Diego<br/>         Schumacher, Benjamin; University of California San Diego; San Diego State University<br/>         Shiroma, Eric J.; National Institute on Aging<br/>         Wang, Guangxing; Fred Hutchinson Cancer Research Center<br/>         Lee, I-Min; Harvard Medical School<br/>         LaCroix, Andrea; University of California San Diego, Department of Epidemiology</p> |
| <b>Primary Subject Heading</b>: | Public health                                                                                                                                                                                                                                                                                                                                                                                                                                                                                                                                                                                                                                                                                                                                                                                                                                                                                                                                                                                                                                                                                                                                         |
| Secondary Subject Heading:      | Oncology                                                                                                                                                                                                                                                                                                                                                                                                                                                                                                                                                                                                                                                                                                                                                                                                                                                                                                                                                                                                                                                                                                                                              |
| Keywords:                       | EPIDEMIOLOGY, ONCOLOGY, PRIMARY CARE, PUBLIC HEALTH                                                                                                                                                                                                                                                                                                                                                                                                                                                                                                                                                                                                                                                                                                                                                                                                                                                                                                                                                                                                                                                                                                   |
|                                 |                                                                                                                                                                                                                                                                                                                                                                                                                                                                                                                                                                                                                                                                                                                                                                                                                                                                                                                                                                                                                                                                                                                                                       |

SCHOLARONE™  
Manuscripts



I, the Submitting Author has the right to grant and does grant on behalf of all authors of the Work (as defined in the below author licence), an exclusive licence and/or a non-exclusive licence for contributions from authors who are: i) UK Crown employees; ii) where BMJ has agreed a CC-BY licence shall apply, and/or iii) in accordance with the terms applicable for US Federal Government officers or employees acting as part of their official duties; on a worldwide, perpetual, irrevocable, royalty-free basis to BMJ Publishing Group Ltd ("BMJ") its licensees and where the relevant Journal is co-owned by BMJ to the co-owners of the Journal, to publish the Work in this journal and any other BMJ products and to exploit all rights, as set out in our [licence](#).

The Submitting Author accepts and understands that any supply made under these terms is made by BMJ to the Submitting Author unless you are acting as an employee on behalf of your employer or a postgraduate student of an affiliated institution which is paying any applicable article publishing charge ("APC") for Open Access articles. Where the Submitting Author wishes to make the Work available on an Open Access basis (and intends to pay the relevant APC), the terms of reuse of such Open Access shall be governed by a Creative Commons licence – details of these licences and which [Creative Commons](#) licence will apply to this Work are set out in our licence referred to above.

Other than as permitted in any relevant BMJ Author's Self Archiving Policies, I confirm this Work has not been accepted for publication elsewhere, is not being considered for publication elsewhere and does not duplicate material already published. I confirm all authors consent to publication of this Work and authorise the granting of this licence.

1  
2  
3 Title: Cohort Profile: The Women's Health Accelerometry Collaboration  
4

5 Authors

6 Kelly R. Evenson, PhD, MS

7 Department of Epidemiology, Gillings School of Global Public Health, University of North  
8 Carolina – Chapel Hill, Chapel Hill, North Carolina, United States

9 Email: kelly\_evenson@unc.edu  
10

11 John Bellettiere, PhD, MPH

12 Division of Epidemiology, Herbert Wertheim School of Public Health and Human Longevity  
13 Science, University of California, San Diego, La Jolla, CA

14 Email: jbellettiere@health.ucsd.edu  
15

16 Carmen C. Cuthbertson, PhD, MCN

17 Department of Epidemiology, Gillings School of Global Public Health, University of North  
18 Carolina – Chapel Hill, Chapel Hill, North Carolina, United States

19 Email: carmenc@email.unc.edu  
20

21 Chongzhi Di, PhD

22 Division of Public Health Sciences, Fred Hutchinson Cancer Research Center, Seattle,  
23 Washington, United States

24 Email: cdi@fredhutch.org  
25

26 Rimma Dushkes, PhD

27 Division of Preventive Medicine, Brigham and Women's Hospital, Boston, MA, United States

28 Email: rdushkes@research.bwh.harvard.edu  
29

30 Annie Green Howard, PhD

31 Department of Biostatistics, Gillings School of Global Public Health, University of North Carolina  
32 – Chapel Hill, Chapel Hill, North Carolina, United States

33 Carolina Population Center, University of North Carolina – Chapel Hill, Chapel Hill, North  
34 Carolina, United States

35 Email: aghoward@email.unc.edu  
36

37 Humberto Parada Jr, PhD, MPH

38 Division of Epidemiology and Biostatistics, School of Public Health, San Diego State University,  
39 San Diego, California, United States

40 Moores Cancer Center, University of California, San Diego, La Jolla, California, United States

41 Email: hparada@sdsu.edu  
42

43 Benjamin T. Schumacher, MPH

44 Herbert Wertheim School of Public Health and Longevity Science, UC San Diego School of  
45 Medicine, San Diego, California, United States

46 Division of Epidemiology and Biostatistics, School of Public Health, San Diego State University,  
47 San Diego, California, United States

48 Email: btschuma@health.ucsd.edu  
49

50 Eric J Shiroma, ScD

51 Laboratory of Epidemiology and Population Science

52 National Institute on Aging, Baltimore, Maryland, United States

53 Email: eric.shiroma@nih.gov  
54

1  
2  
3  
4 Guangxing Wang, PhD  
5 Division of Public Health Sciences, Fred Hutchinson Cancer Research Center, Seattle,  
6 Washington, United States  
7 Email: gwang234@fredhutch.org  
8

9 \*I-Min Lee, MBBS, ScD  
10 Division of Preventive Medicine, Brigham and Women's Hospital, Harvard Medical School,  
11 Boston, MA, United States  
12 Department of Epidemiology, Harvard T.H. Chan School of Public Health, Boston, MA, United  
13 States  
14 Email: ilee@rics.bwh.harvard.edu  
15

16  
17 \*Andrea Z. LaCroix, PhD  
18 Division of Epidemiology, Herbert Wertheim School of Public Health and Human Longevity  
19 Science, University of California, San Diego, La Jolla, CA  
20 Email: alacroix@health.ucsd.edu  
21

22 **\*joint senior authors**  
23  
24  
25

26 Address for Correspondence: Kelly R. Evenson, 123 W Franklin Street, Building C, Suite 410,  
27 University of NC, Gillings School of Global Public Health, Department of Epidemiology, Chapel  
28 Hill, North Carolina, USA 27599-8050, email: kelly\_evenson@unc.edu  
29  
30  
31  
32  
33  
34  
35  
36  
37  
38  
39  
40  
41  
42  
43  
44  
45  
46  
47  
48  
49  
50  
51  
52  
53  
54  
55  
56  
57  
58  
59  
60

## Abstract

Purpose: This paper describes the Women's Health Accelerometry Collaboration, a consortium of two prospective cohort studies of women age 62 years or older, harmonized to explore the association of accelerometer-assessed physical activity and sedentary behavior with cancer incidence and mortality.

Participants: A total of 23,443 women (age mean 73.4, SD 6.8) living in the United States and participating in an observational study were included; 17,061 from the Women's Health Study (WHS) and 6382 from the Women's Health Initiative Objective Physical Activity and Cardiovascular Health (WHI/OPACH) Study.

Findings to Date: Accelerometry, cancer outcomes, and covariate harmonization was conducted to align the two cohort studies. Physical activity and sedentary behavior were measured using similar procedures with an ActiGraph GT3X+ accelerometer, worn at the hip for one week, during 2011-2014 for WHS and 2012-2014 for WHI/OPACH. Cancer outcomes were ascertained via ongoing surveillance using physician adjudicated cancer diagnosis. Relevant covariates were measured using questionnaire or physical assessments. Among 23,443 women who wore the accelerometer for at least 10 hours on a single day, 22,868 women wore the accelerometer at least 10 hours/day on  $\geq 4$  of 7 days. The analytic sample ( $n=22,852$ ) averaged 4976 (standard deviation (SD) 2669) steps/day and engaged in an average of 80.8 (SD 46.5) minutes/day of moderate-to-vigorous, 105.5 (SD 33.3) minutes/day of light high, and 182.1 (SD 46.1) minutes/day of light low physical activity. A mean of 8.7 (SD 1.7) hours/day were spent in sedentary behavior. Overall, 11.8% of the cohort had a cancer diagnosis (other than non-melanoma skin cancer) at the time of accelerometry measurement. During an average of 5.9 (SD 1.6) years of follow-up, 1378 cancer events among which 414 were fatal have occurred.



1  
2  
3 Future Plans: Using the harmonized cohort, we will access ongoing cancer surveillance to  
4  
5 quantify the associations of physical activity and sedentary behavior with cancer incidence and  
6  
7 mortality.  
8  
9

10  
11 Keywords: accelerometry; cancer; cohort study; physical activity; sedentary behavior  
12  
13

### 14 **Strengths and limitations of this study**

- 15  
16  
17  
18 - The combined prospective cohort will address research questions pertaining to  
19  
20 accelerometer-assessed physical activity and sedentary behavior with cancer outcomes  
21  
22 due to similar measurement protocols for the exposures, outcomes, and important  
23  
24 covariates.  
25  
26 - A variety of sociodemographic, behavioral, and medical history were collected over  
27  
28 many years prior to accelerometry measurement that allows for control of important  
29  
30 confounders.  
31  
32 - Accelerometry was assessed for one week and may not represent behavior during the  
33  
34 entire follow-up period.  
35  
36 - A longer follow-up period will be needed to explore the relationships of accelerometry-  
37  
38 assessed behaviors with rare cancers.  
39  
40  
41  
42  
43  
44  
45  
46  
47  
48  
49  
50  
51  
52  
53  
54  
55  
56  
57  
58  
59  
60

## Introduction

Cancer is the second leading cause of death in the United States for women, with an estimated 289,150 cancer-related deaths and 927,910 new cancer cases predicted to occur among women in 2021.<sup>1</sup> The leading types of new cancer cases for women include breast (30%), lung and bronchus (13%), colon and rectum (8%), uterine corpus (7%), skin melanoma (5%), and non-Hodgkin lymphoma (4%).<sup>1</sup> Cancer risk increases with age; however, certain screening tests are not recommended for adults 75 years or older since the harms outweigh the benefits.<sup>2</sup> This results in cancer that is often diagnosed at a more advanced stage among women 75 years or older than among women under the age of 75 years.

With a rapidly growing older population, there will be an increased demand for cancer-related health care. Among women at age 85 years without a history of cancer, the probability of cancer diagnosis in their remaining lifetime is 12.8% and the probability of cancer death is 9.6%.<sup>2</sup> Focusing on risk factors that are modifiable in later life that can help reduce cancer burden, such as physical activity and sedentary behavior, should be a public health priority.

Observational studies consistently report associations between lower self-reported moderate-to-vigorous leisure-time physical activity and increased risk of several cancer types.<sup>3</sup> In support of this, the 2018 United States' Physical Activity Guidelines Advisory Committee (PAGAC),<sup>4</sup> updated in 2019,<sup>5</sup> identified an overall evidence grade of "strong" comparing the highest to the lowest levels of physical activity on the risk of developing bladder, breast, colon, endometrial, esophageal adenocarcinoma, renal, and gastric cancers, and an overall evidence grade of "moderate" for lung cancer. However, there was a limited dose response gradient for esophageal adenocarcinoma, lung, and renal cancers. The review indicated limited evidence on physical activity occurring outside of leisure-time, such as transportation, occupational, or household activities. The review also found that few studies reported on associations between

1  
2  
3 physical activity and cancer by population subgroups, such as by age, socioeconomic status, or  
4  
5 race/ethnicity.  
6  
7

8  
9 The PAGAC also reported limited evidence on the relationship of sedentary behavior with  
10  
11 cancer incidence and mortality.<sup>4,6</sup> Evidence supporting the PAGAC statements were primarily  
12  
13 based on self-reported physical activity and sedentary behavior data. Self-reported light activity  
14  
15 is especially difficult to recall, and is the most common intensity level older adults participate  
16  
17 in.<sup>7,8</sup> To date, few studies of older adults have explored accelerometer-assessed physical  
18  
19 activity and sedentary behavior with cancer incidence and mortality.<sup>9-12</sup> The scarcity of evidence  
20  
21 is likely due to the need for larger studies with longer follow-up time to investigate cancer  
22  
23 outcomes, particularly for the less common tumor sites.  
24  
25

26  
27  
28 The Women's Health Accelerometry Collaboration will explore the associations of  
29  
30 accelerometer-assessed physical activity and sedentary behavior with cancer outcomes by  
31  
32 combining data from two large prospective studies: the Women's Health Study (WHS) and the  
33  
34 Women's Health Initiative Objective Physical Activity and Cardiovascular Health (WHI/OPACH)  
35  
36 Study. This endeavor requires harmonization of accelerometry, cancer outcomes, and  
37  
38 covariates. The study will provide important insights on cancer incidence and mortality among  
39  
40 women 62 years and older. The specific aim for this paper is to describe the rationale,  
41  
42 methodology, proposed analysis plan, and characteristics of the cohort.  
43  
44  
45

### 46 47 **Cohort Description** 48

49 In order to address the scientific gaps, we harmonized two cohort studies of women 62 years  
50  
51 and older using similar data collection methodologies to quantify the associations between  
52  
53 physical activity and sedentary behavior with multiple site-specific incident cancers and overall  
54  
55 fatal cancers.  
56  
57

1  
2  
3 Patient and public involvement: Patients and/or the public were not involved in the design,  
4  
5  
6  
7  
8  
9  
10  
11  
12  
13  
14  
15  
16  
17  
18  
19  
20  
21  
22  
23  
24  
25  
26  
27  
28  
29  
30  
31  
32  
33  
34  
35  
36  
37  
38  
39  
40  
41  
42  
43  
44  
45  
46  
47  
48  
49  
50  
51  
52  
53  
54  
55  
56  
57  
58  
59  
60

conduct, reporting, or dissemination of this research.

WHS: The WHS is a completed randomized trial (1992–2004) testing aspirin, beta-carotene, and vitamin E for preventing cardiovascular disease and cancer among 39,876 healthy United States women at least 45 years of age.<sup>13-15</sup> When the trial ended, women were invited to continue in an observational study. Of the 33,682 alive, 89% of women consented, reporting on their health habits and medical history annually on questionnaires. From 2011-2014, an ancillary study was conducted to collect accelerometry among participants.<sup>16</sup> In 2011, 29,494 women were alive and 18,289 agreed to participate and were sent an accelerometer, 6931 declined participation, 1456 were ineligible because they were unable to walk outside of the home, and the remaining 2818 did not respond to the invitation. Overall, 17,466 women returned the accelerometers for downloading. All study protocols were approved by the Brigham and Women's Hospital Institutional Review Board, and all women gave written informed consent.

All of the women in the accelerometer substudy were previously in the pharmacotherapy intervention arms (either active or placebo).<sup>13-15</sup> The pharmacotherapy intervention did not impact cancer incidence or mortality.<sup>13-14</sup> Thus, the interventions are unlikely to impact the associations we seek to investigate, namely the associations of physical activity and sedentary behavior with cancer outcomes.

WHI/OPACH: From 1993 to 1998, the WHI study initially recruited women 50-79 years for either a clinical trial(s) or an observational study from 40 clinical sites throughout the United States. The WHI/OPACH Study<sup>17</sup> is an ancillary study to the WHI Long Life Study,<sup>18</sup> which was a substudy to WHI. The sampling frame of the WHI Long Life Study were all surviving and actively participating women from the hormone therapy trials with age  $\geq 63$  years and all Hispanic and

1  
2  
3 African American women in WHI. The WHI/OPACH ancillary study was designed to collect  
4 physical activity and sedentary behavior measured by accelerometry and self-report, and to  
5 collect detailed data on incident falls using daily falls calendars collected for up to 13 months.  
6  
7 The primary outcomes of the original study included mortality,<sup>19</sup> falls,<sup>20</sup> and cardiovascular  
8 disease.<sup>21,22</sup> From 2012-2014, 9252 United States women consented to the WHI Long Life  
9 Study. Among those participants, 8618 consented by mail or phone to participate in the  
10 WHI/OPACH ancillary study collecting accelerometry. From those who consented, 58 women  
11 died before they could be contacted to begin participation, 10 died before receiving the  
12 materials, 141 were determined to be ineligible (e.g., dementia, residing in a nursing home, not  
13 ambulatory), 765 could not be contacted, and 596 declined to participate when contacted. In  
14 summary, 7048 women were sent the accelerometer, a sleep log, the OPACH physical activity  
15 questionnaire (available in this paper<sup>17</sup>), and 13 falls calendars. Overall, 6489 women returned  
16 the accelerometers for downloading. All study protocols were approved by the Fred Hutchinson  
17 Cancer Research Center Institutional Review Board, and all women gave informed consent.  
18  
19  
20  
21  
22  
23  
24  
25  
26  
27  
28  
29  
30  
31  
32  
33  
34

35 Accelerometry Data Collection: Both cohorts utilized the same accelerometer (ActiGraph  
36 GT3X+ accelerometer (Pensacola, Florida). The triaxial accelerometer was small (4.6x3.3x1.5  
37 cm) and light weight (19 grams), with a dynamic range of +/-6 G. The WHS women were asked  
38 to wear the accelerometer on their right hip, removing it only during sleep, for 7 days. They were  
39 also asked to keep a log documenting wear and non-wear days.<sup>16</sup> The accelerometer and log  
40 were mailed to participants, with a mailer for return.  
41  
42  
43  
44  
45  
46  
47  
48  
49

50 The WHI/OPACH women were asked to wear the accelerometer on their right hip for 7 days,  
51 including night time. The WHI/OPACH women were asked to keep a sleep log for in- and out-of-  
52 bed wear.<sup>23</sup> For women with missing sleep log data, their in-bed and out-of-bed times were  
53 imputed using person-specific means, if available, or the sample mean. Using the sleep log, the  
54  
55  
56  
57  
58  
59  
60

1  
2  
3 in-bed wear was removed to make the data congruent across the two cohorts. The  
4 accelerometer and log were given to most women at their study visit and were mailed back after  
5 completion.  
6  
7  
8  
9

10  
11 The accelerometer recorded 3-dimensional raw acceleration signals at 30 Hz, which were  
12 aggregated using ActiLife software (version 6) to counts per 15-second epochs with the normal  
13 filter setting. To better detect movement from all directions, vector magnitude (VM) counts were  
14 derived by taking the square root of the sum of the three axes squared. Non-wear time was  
15 assessed using the validated Choi et al. algorithm,<sup>24,25</sup> defined as an interval of at least 90  
16 consecutive minutes of zero VM counts/minute, with allowance of up to one 2-minute period of  
17 nonzero VM counts and requiring that no counts were detected during the 30 minutes upstream  
18 and downstream from that period.  
19  
20  
21  
22  
23  
24  
25  
26  
27  
28  
29

30  
31 Several metrics were used to describe physical activity and sedentary behavior from the  
32 accelerometer. First, average intensity per day was summarized as average VM/15-seconds.  
33 Second, using WHI/OPACH calibration-study derived accelerometry cutpoints, we defined  
34 sedentary behavior and physical activity from receiver operating characteristic curve analyses  
35 that balanced the number of false positives and false negatives.<sup>26</sup> VM/15-second cutpoints were  
36 defined as follows: sedentary 0-18, light low 19-225, light high 226-518, and moderate-to-  
37 vigorous physical activity  $\geq 519$ . Third, a moderate-to-vigorous bout was defined as  $\geq 10$   
38 minutes of consecutive moderate-to-vigorous minutes, with allowance for interruptions for up to  
39 20% of the time below the threshold and  $< 5$  consecutive minutes below the threshold (to set a  
40 maximum time when bouts occur  $\geq 25$  minutes). The bout must start and end with moderate-to-  
41 vigorous physical activity.<sup>27,28</sup> Fourth, average steps per day was explored, derived from  
42 ActiGraph's proprietary algorithm.  
43  
44  
45  
46  
47  
48  
49  
50  
51  
52  
53  
54  
55  
56  
57  
58  
59  
60

1  
2  
3 Cancer Incidence and Mortality Outcomes: WHS participants received annual mailed  
4 questionnaires which asked about health history, including a diagnosis of cancer. Relevant  
5 medical records were obtained for all self-reported cancers (except for non-melanoma skin  
6 cancer).  
7  
8  
9  
10

11  
12  
13  
14 As part of WHI, participants received annual mailed questionnaires which asked about physician  
15 diagnosis of new cancer or malignant tumors, hospitalizations, and other health history. Medical  
16 records were obtained for all self-reported cancers except non-melanoma skin cancer.<sup>29</sup>  
17  
18  
19

20  
21  
22 For both studies, physician adjudicators coded cancer using medical record documents such as  
23 the pathology report, hospital face sheet, operative report, hospital discharge summary,  
24 oncology consultation, radiology report, and tumor registry abstract. The date of cancer  
25 diagnosis is based on one of the following: microscopically-confirmed based on date the tissue  
26 that resulted in a positive pathology was removed, not microscopically-confirmed based on the  
27 date of first hospitalization for cancer, self-report only based on date reported by participant, and  
28 both autopsy-only and death certificate-only based on death date.  
29  
30  
31  
32  
33  
34  
35  
36  
37  
38

39 For WHS, an Endpoints Committee of physicians blinded to questionnaire exposure data  
40 reviewed all medical records using pre-specified criteria. A cancer diagnosis was confirmed with  
41 histological or cytological evidence. In the absence of these diagnostic tests, strong clinical  
42 evidence accompanied by radiologic evidence or laboratory markers was used to confirm  
43 cancer occurrence. The histological type, grade, and stage of cancer were recorded. The date  
44 of cancer diagnosis was based on the earliest date of the relevant evidence (e.g., date of  
45 histological confirmation). For cancers diagnosed only on death certificates without prior  
46 medical records, the date of death was used.  
47  
48  
49  
50  
51  
52  
53  
54  
55  
56  
57  
58  
59  
60

1  
2  
3 Coding of cancer type was based on the Surveillance, Epidemiology, and End Results (SEER)  
4 program. Using the International Classification of Diseases for Oncology (ICD-O-3), the  
5 morphology code details the type and behavior of a tumor.<sup>30</sup> The code contained three parts:  
6 histology or cell type (4 digits), behavior or the way it acts in the body (1 digit), and grade,  
7 differentiation or phenotype (1 digit). Histology of the primary tumor was ascertained and its  
8 behavior code were ascertained. A behavior code is defined as 0: benign; 1: uncertain whether  
9 benign or malignant; 2: carcinoma in situ; and 3 or higher: malignant (invasive) primary site.  
10 These codes were applied identically across both cohorts; the final classification of cancer by  
11 site was limited to behavior code 3 and is summarized in **Supplemental Table 1**.<sup>3</sup>  
12  
13  
14  
15  
16  
17  
18  
19  
20  
21  
22  
23

24 Cancer surveillance is currently ongoing in both cohorts. Additionally, we ascertained if women  
25 had been diagnosed with a cancer prior to the accelerometer data collection, including type of  
26 cancer and time since diagnosis. For both cohorts, deaths were reported by family members or  
27 cancer and time since diagnosis. For both cohorts, deaths were reported by family members or  
28 postal authorities, with medical records, interviews with next of kin, and death certificates  
29 obtained to confirm the event. The National Death Index was searched periodically for cohort  
30 members. The underlying cause of death was classified on the basis of the death certificate,  
31 medical records, and other records such as an autopsy report using the ICD 10<sup>th</sup> edition. The  
32 death certificate diagnosis was used when no other records are available. In this paper, we  
33 report on cancer diagnosed from study enrollment to the date of accelerometry measurement.  
34  
35  
36  
37  
38  
39  
40  
41  
42  
43  
44

45 Covariates: Sociodemographics, including age, race/ethnicity, and education were collected at  
46 study enrollment. Participants from both cohorts regularly completed mailed questionnaires  
47 regarding their health history and health behaviors and we used the measure closest to the time  
48 of accelerometer wear. Women identified their general health by answering the question, "In  
49 general, would you say your health is excellent, very good, good, fair, or poor?" Women also  
50 reported on smoking status, alcohol intake, postmenopausal hormone use, and history of  
51  
52  
53  
54  
55  
56  
57  
58  
59  
60



1  
2  
3 diabetes, confirmed coronary heart disease, bilateral oophorectomy, and hysterectomy. Height  
4 and weight were self-reported in WHS and measured in WHI/OPACH. Body mass index (BMI)  
5 was calculated as weight in kilograms divided by height in meters squared and defined as  
6  
7  
8  
9  
10  
11  
12  
13  
14  
15  
16  
17  
18  
19  
20  
21  
22  
23  
24  
25  
26  
27  
28  
29  
30  
31  
32  
33  
34  
35  
36  
37  
38  
39  
40  
41  
42  
43  
44  
45  
46  
47  
48  
49  
50  
51  
52  
53  
54  
55  
56  
57  
58  
59  
60

diabetes, confirmed coronary heart disease, bilateral oophorectomy, and hysterectomy. Height and weight were self-reported in WHS and measured in WHI/OPACH. Body mass index (BMI) was calculated as weight in kilograms divided by height in meters squared and defined as underweight (<18.5), normal weight (18.5-24.9), overweight (25.0-29.9), or obese ( $\geq 30.0$ ).

Walking speed was collected from self-administered questionnaires. WHS women were asked, “What is your usual walking pace outdoors?” WHI/OPACH women were asked, “When you walk at home for more than 10 minutes without stopping, what is your usual speed?” We harmonized the response options as follows:

- (1) <2 mph: easy, casual, <2 mph (WHS); casual strolling or walking <2 mph (WHI/OPACH)
- (2) 2-2.9 mph: normal, average, 2-2.9 mph (WHS); average or normal, 2-3 mph (WHI/OPACH)
- (3) 3-3.9 mph: brisk pace, 3-3.9 mph (WHS); fairly fast, 3-4 mph (WHI/OPACH)
- (4) 4 mph or more: very brisk, striding, >4 mph (WHS); very fast, >4 mph (WHI/OPACH)
- (5) Unknown or does not walk regularly: don't walk regularly (WHS); don't know, rarely or never walks >10 minutes (WHI/OPACH)

Proposed Statistical Analysis: We will explore the association of physical activity and sedentary behavior with cancer incidence and mortality. For site-specific cancer analyses, if participants have a history of the cancer under analysis then they will be excluded. For example, if we analyze lung cancer incidence then we will exclude women who already have a lung cancer diagnosis prior to the accelerometer measurement. For composite cancer (a subset of cancer types combined) and total cancer analyses, we will include women who have a history of cancer prior to accelerometry measurement. For these analyses, we can further explore whether excluding those with cancer impacts the results or whether having prior cancer is a moderator.

1  
2  
3 Women with a hysterectomy prior to accelerometry measurement will be excluded from  
4 investigation of incident endometrial cancer. Similarly, women with bilateral oophorectomy prior  
5 to accelerometry measurement will be excluded from investigation of incident ovarian cancer.  
6  
7  
8  
9

10  
11 We will use stratified Cox regression models to estimate hazard ratios and 95% confidence  
12 intervals for various measures of physical activity and sedentary behavior with cancer incidence  
13 and mortality. The stratified model allows the baseline hazards for the two cohorts to differ.<sup>31</sup>  
14  
15 However, the hazards of the exposure groups are assumed to be proportional, which will be  
16 tested using Schoenfeld residuals. We will censor follow-up time on the date of the cancer  
17 diagnosis, the date of death, or the date of last contact. Potential confounders will be the  
18 harmonized covariates described in the “Covariates” section.  
19  
20  
21  
22  
23  
24  
25  
26  
27

28 Analytic Sample: In total, 25,337 women were sent an accelerometer, with 18,289 contributing  
29 from the WHS cohort and 7048 from the WHI/OPACH cohort (**Table 1**). After excluding those  
30 that did not return the accelerometer, did not wear the accelerometer, or experienced  
31 accelerometer malfunction, 23,443 (92.5%) and 22,868 (90.3%) women contributed at least one  
32 and four adherent days of accelerometry wear, respectively, defined as wearing the device for  
33 at least 10 hours during a day while awake. WHS began as a trial for the primary prevention of  
34 cancer and cardiovascular disease; however, post-randomization, 16 women were  
35 subsequently found to have prevalent cancer and are excluded from the present study. The final  
36 sample size for the analyses was 22,852.  
37  
38  
39  
40  
41  
42  
43  
44  
45  
46  
47  
48  
49

### 50 **Findings To Date**

51 At the time of accelerometry measurement, both cohorts had a mean age above 70 years (78.7  
52 (SD 6.7) WHI/OPACH, 71.5 (SD 5.7) WHS), with a range of 63-97 for WHI/OPACH and 62-89  
53 years for WHS. Both cohorts had a mean BMI in the overweight category (28.1 kg/m<sup>2</sup> (SD 5.7)  
54  
55  
56  
57  
58  
59  
60

1  
2  
3 WHI/OPACH, 26.2 kg/m<sup>2</sup> (SD 5.0) WHS). WHI/OPACH women compared to WHS women had a  
4 lower proportion with at least some college education (79.7% vs. 100%), very good or excellent  
5 general health (50.6% vs. 74.7%), drank alcohol daily (5.7% vs. 15.9%), used postmenopausal  
6 hormones (2.5% vs. 9.9%), and walked at least 3 mph (7.8% vs. 27.5%) (**Table 2**). At the time  
7 of accelerometry measurement, the WHI/OPACH women compared to WHS women included a  
8 higher proportion of Black (33.4% WHI/OPACH vs. 1.5% WHS) and Hispanic (16.9% vs. 0.9%)  
9 women and had a higher proportion with diabetes (20.3% vs. 9.0%) and coronary heart disease  
10 (10.1% vs. 4.3%). The two cohorts were more similar with regards to never smoking (54.7%  
11 WHI/OPACH, 50.5% WHS), cancer (11.7%, 11.9%), and receipt of a bilateral oophorectomy  
12 (19.2%, 22.2%) or a hysterectomy (42.6%, 41.6%).  
13  
14  
15  
16  
17  
18  
19  
20  
21  
22  
23  
24  
25

26 Most women provided at least four days of adherent data (defined as 10 hours/day), with 14.9  
27 hours/day of average awake wear time (**Table 3**). The WHS women engaged in a higher mean  
28 total volume of physical activity (146 vs. 101 average daily VM/15-seconds) and accumulated  
29 more mean steps per day (5489 vs. 3573) than WHI/OPACH women. WHS women engaged in  
30 approximately 2-3 times more mean moderate-to-vigorous physical activity (91.9 vs. 50.4  
31 minutes/day) and bouts (18.2 vs. 6.4 minutes/day) than WHI/OPACH women. In contrast, mean  
32 light high and light low activity were similar. Sedentary behavior was lower among WHS women  
33 compared to WHI/OPACH women (510.6 vs. 555.6 minutes/day). It is important to note that  
34 some of the differences in accelerometry measures between cohorts may be due to age, such  
35 as indicated in **Table 4**, or due to other potential confounders.  
36  
37  
38  
39  
40  
41  
42  
43  
44  
45  
46  
47  
48

49 We examined the number of incident and fatal cancers in the cohort, with cancer outcomes  
50 documented through December 31, 2019 for WHS and through March 30, 2020 for  
51 WHI/OPACH. During an average of 5.9 (SD 1.6) years of follow-up thus far, 1378 cancer events  
52  
53  
54  
55  
56  
57  
58

1  
2  
3 occurred among which 414 were fatal. The most common cancers were breast (459) and lung  
4  
5 (146) cancer.  
6  
7  
8

### 9 **Strengths and Limitations**

10  
11 The Women's Health Accelerometry Collaboration cohort's primary strength is the statistical  
12  
13 power to be able to address research questions regarding physical activity and sedentary  
14  
15 behavior with cancer among older women in a cost-efficient manner by using data from existing  
16  
17 studies. Cancer outcomes continue to be assessed annually by similar methods, adjudicated,  
18  
19 and combined systematically across cohorts. Accelerometry was collected by the same device  
20  
21 using similar procedures and excellent adherence.  
22  
23  
24  
25

26  
27 A WHI/OPACH substudy of 200 women participated in a variety of laboratory-based activities  
28  
29 while wearing the accelerometer and having oxygen uptake measured. Using these data,  
30  
31 accelerometer cutpoints were developed specifically for women 60 years and older.<sup>26</sup> The  
32  
33 cutpoint was calibrated to estimate moderate to vigorous activity among older women, which is  
34  
35 why the number of minutes may be higher than those reported from other studies that utilize  
36  
37 calibration equations developed in younger samples of adults (i.e., what might be a "light"  
38  
39 activity in a younger woman may actually require moderate or higher effort in an older woman).  
40  
41  
42

43  
44 Raw accelerometry data will allow the research team to develop further measures of physical  
45  
46 activity and sedentary behavior, such as using the activity index<sup>32</sup> and latent class analysis on  
47  
48 accelerometry.<sup>33</sup> Using the raw data, we can also apply two machine-learned algorithms  
49  
50 developed specifically for older women; one designed to distinguish sitting, riding in a vehicle,  
51  
52 standing still, standing moving, and walking,<sup>34</sup> while the other was designed to accurately  
53  
54 quantify sitting bouts,<sup>35</sup> which, without the algorithm, are measured with substantial error.<sup>36</sup>  
55  
56  
57  
58

1  
2  
3 While studies investigating the associations between less common cancer subtypes and  
4 physical activity or sedentary behavior among older women have been limited due to smaller  
5 sample sizes and few cancer events, the combined cohorts provide improvement in statistical  
6 power, allowing researchers to be better equipped to investigate these associations. In addition  
7 to increasing power for the less common cancer outcomes, by including both cohorts we  
8 capture more diversity in the population of women in this age range which allows us to better  
9 understand these associations in a more heterogenous population.  
10  
11  
12  
13  
14  
15  
16  
17  
18  
19

20 The Women's Health Accelerometry Collaboration cohort has several limitations. First, the  
21 accelerometer was worn once by participants for one week. It is possible that physical activity  
22 and sedentary behavior could change seasonally and over the course of follow-up, and thus not  
23 be represented by the measurement week. To address this concern, the question was explored  
24 in a subset of WHS participants that wore the accelerometer up to 3 times over a 2-3 year  
25 period, the initial measures of physical activity and sedentary behavior provided a reproducible  
26 measure at repeated time points.<sup>37</sup> Adjusting for age, season, and BMI, the intraclass  
27 correlation coefficients between women indicated moderate to high reproducibility for average  
28 VM counts/day (0.83; 95% confidence interval 0.78, 0.87), sedentary behavior (0.73; 0.66,  
29 0.80), light activity (0.67; 0.59,0.74), and moderate-to-vigorous physical activity (0.83;  
30 0.78,0.87). This indicated that metrics derived from one week of accelerometer administration  
31 can estimate longer-term patterns of behavior among women of similar ages.  
32  
33  
34  
35  
36  
37  
38  
39  
40  
41  
42  
43  
44  
45  
46

47 Second, there will need to be a longer follow-up period or other cohorts to address the  
48 relationships of accelerometry-assessed behaviors with rare cancers. Third, women that could  
49 not walk without assistance outside of their home were excluded due to the development of  
50 existing accelerometer algorithms on ambulation. More effort is needed to understand how to  
51 interpret accelerometry from non-ambulatory individuals in order to include them in studies of  
52  
53  
54  
55  
56  
57  
58  
59  
60

1  
2  
3 this kind.<sup>38</sup> Fourth, while WHS initially mailed accelerometers and used an awake only protocol,  
4  
5 in contrast WHI/OPACH provided most of the accelerometers in-person at the home visit and  
6  
7 used a 24-hour wear protocol. Despite these differences, there did not appear to be differential  
8  
9 impact on accelerometer awake wear time between the cohorts (**Table 3**). Fifth, most potential  
10  
11 confounders were similarly measured across the two cohorts. However, height and weight  
12  
13 assessed near the time of accelerometry measurement were self-reported in WHS and  
14  
15 measured in WHI/OPACH.  
16  
17  
18  
19

### 20 **Collaboration**

21  
22 Data are accessible through the established data sharing policies for the Women's Health Study  
23  
24 at [https://www.ncbi.nlm.nih.gov/projects/gap/cgi-bin/study.cgi?study\\_id=phs001964.v1.p1](https://www.ncbi.nlm.nih.gov/projects/gap/cgi-bin/study.cgi?study_id=phs001964.v1.p1) and  
25  
26 <http://whs.bwh.harvard.edu/> . Similarly, data are accessible through the established data sharing  
27  
28 policies for the Women's Health Initiative at <https://www.whi.org/page/working-with-ghi-data>.  
29  
30 Interested researchers can write to the study to clarify data access. Due to data sharing  
31  
32 agreements, the Women's Health Accelerometry Collaboration data are not directly available.  
33  
34  
35  
36

37 **Acknowledgments:** The authors thank Chris Moore and Fang Wen for their analytic support,  
38  
39 and Steve Moore for assistance with the cancer outcome coding. We acknowledge the WHI  
40  
41 investigators listed at the following link: [https://www-ghi-org.s3.us-west-2.amazonaws.com/wp-](https://www-ghi-org.s3.us-west-2.amazonaws.com/wp-content/uploads/WHI-Investigator-Short-List.pdf)  
42  
43 [content/uploads/WHI-Investigator-Short-List.pdf](https://www-ghi-org.s3.us-west-2.amazonaws.com/wp-content/uploads/WHI-Investigator-Short-List.pdf).  
44  
45  
46

47 **Contributors:** KRE conceived of and drafted the manuscript and GW conducted the data  
48  
49 analysis. IL, EJS, and RD were involved in study design, accelerometry acquisition, and/or  
50  
51 analysis of the WHS. AZL, KRE, IL, CD, BTS, and JB were involved in the study design,  
52  
53 accelerometry acquisition, and/or analysis for the WHI/OPACH Study. In addition, CCC, AGH,  
54  
55 HP, and GW provided critical interpretation of the data harmonization and analysis for this work.  
56  
57  
58  
59

1  
2  
3 All authors (KRE, JB, CCC, CD, RD, AGH, HP, BTS, EJS, GW, IL, AZL) reviewed the  
4 manuscript critically and approved the final version.  
5  
6  
7  
8

9 **Funding:** The study was supported by the National Institutes of Health (NIH) 5R01CA227122:  
10 National Cancer Institute, Office of the Director, Office of Disease Prevention, and Office of  
11 Behavioral and Social Sciences Research. WHS is funded by NIH grants CA154647,  
12 CA047988, CA182913, HL043851, HL080467, and HL099355. The WHI program is funded by  
13 NIH, National Heart, Lung, and Blood Institute (NHLBI) #75N92021D00001, 75N92021D00002,  
14 75N92021D00003, 75N92021D00004, 75N92021D00005, and grant R01HL105065. Dr.  
15 Cuthbertson was supported by a NHLBI National Research Service Award (T32-HL007055). Dr.  
16 Parada was supported by the National Cancer Institute (K01 CA234317), the SDSU/UCSD  
17 Comprehensive Cancer Center Partnership (U54 CA132384 & U54 CA132379), and the  
18 Alzheimer's Disease Resource Center for Advancing Minority Aging Research at the University  
19 of California San Diego (P30 AG059299). Dr. Shiroma was supported by the Intramural  
20 Research Program at the NIH National Institute on Aging. The content is solely the responsibility  
21 of the authors and does not necessarily represent the official views of the NIH.  
22  
23  
24  
25  
26  
27  
28  
29  
30  
31  
32  
33  
34  
35  
36  
37  
38

39 **Competing interests:** None declared  
40  
41  
42

43 **Patient consent for publication:** Not required  
44  
45  
46

47 **Ethics approval:** All study procedures were reviewed and approved by the University of North  
48 Carolina Institutional Review Boards at the University of North Carolina, Mass General Brigham,  
49 and the University of California – San Diego.  
50  
51  
52  
53  
54  
55

56 **Provenance and peer review:** Not commissioned; externally peer reviewed.  
57  
58

1  
2  
3  
4  
5 **Data availability statement:** Data are available for the Women's Health Study at  
6 [https://www.ncbi.nlm.nih.gov/projects/gap/cgi-bin/study.cgi?study\\_id=phs001964.v1.p1](https://www.ncbi.nlm.nih.gov/projects/gap/cgi-bin/study.cgi?study_id=phs001964.v1.p1) and for  
7 the Women's Health Initiative OPACH Study at <https://www.whi.org/page/working-with-whi-data>.  
8  
9  
10  
11 Researchers using the data are required to follow the terms designed to protect the privacy of  
12 the participants.  
13  
14  
15

16  
17  
18 **Open access:** This is an open access article distributed in accordance with the Creative  
19 Commons Attribution Non Commercial (CC BY-NC 4.0) license, which permits others to  
20 distribute, remix, adapt, build upon this work non-commercially, and license their derivative  
21 works on different terms, provided the original work is properly cited, appropriate credit is given,  
22 any changes made indicated, and the use is non-commercial. See  
23 <http://creativecommons.org/licenses/by-nc/4.0/>.  
24  
25  
26  
27  
28  
29  
30  
31

32 **ORCID:**

33 Kelly Evenson <https://orcid.org/0000-0002-3720-5830>

34 John Bellettiere <https://orcid.org/0000-0002-7167-3048>

35 Carmen Cuthbertson <https://orcid.org/0000-0001-5145-9098>

36 Chongzhi Di <http://orcid.org/0000-0002-1371-581X>

37 Annie Green Howard <https://orcid.org/0000-0003-0837-8166>

38 Andrea LaCroix <https://orcid.org/0000-0002-9532-976X>

39 I-Min Lee <https://orcid.org/0000-0002-1083-6907>

40 Humberto Parada <https://orcid.org/0000-0001-6562-8577>

41 Benjamin Schumacher <https://orcid.org/0000-0002-3099-3387>

42 Eric J Shiroma <http://orcid.org/0000-0003-4920-2642>

43 Guangxing Wang <https://orcid.org/0000-0002-4722-3127>



## References

1. American Cancer Society. *Cancer Facts and Figures 2021*. Accessed at <https://www.cancer.org/research/cancer-facts-statistics/all-cancer-facts-figures/cancer-facts-figures-2021.html>. Atlanta, Georgia; 2021. Page 1-67.
2. American Cancer Society. *Cancer Facts and Figures, 2019. Cancer in the Oldest Old*. Accessed at <https://www.cancer.org/research/cancer-facts-statistics/all-cancer-facts-figures/cancer-facts-figures-2019.html>. Atlanta, Georgia;2019. Page 29-43.
3. Moore SC, Lee IM, Weiderpass E, et al. Association of Leisure-Time physical activity with risk of 26 types of cancer in 1.44 million adults. *JAMA Intern Med*. 2016;176(6):816-25.
4. 2018 Physical Activity Guidelines Advisory Committee. *2018 Physical Activity Guidelines Advisory Committee Scientific Report*. Accessed at <https://health.gov/paguidelines/second-edition/report.aspx>. Washington, DC: Department of Health and Human Services; 2018.
5. McTiernan A, Friedenreich CM, Katzmarzyk PT, et al. Physical activity in cancer prevention and survival: a systematic review. *Med Sci Sports Exercise*. 2019;51(6):1252-61.
6. Katzmarzyk PT, Powell KE, Jakicic JM, et al. Sedentary behavior and health: update from the 2018 Physical Activity Guidelines Advisory Committee. *Med Sci Sports Exerc*. 2019;51(6):1227-41.
7. Chastin SFM, De Craemer M, De Cocker K, et al. How does light-intensity physical activity associate with adult cardiometabolic health and mortality? Systematic review with meta-analysis of experimental and observational studies. *Br J Sports Med*. 2019;53(6):370-6.

- 1  
2  
3 8. Fuzeki E, Engeroff T, Banzer W. Health benefits of light-intensity physical activity: a  
4 systematic review of accelerometer data of the National Health and Nutrition  
5 Examination Survey (NHANES). *Sport Med.* 2017;47(9):1769-93.  
6  
7
- 8  
9 9. Dempsey PC, Strain T, Khaw KT, et al. Prospective associations of accelerometer-  
10 measured physical activity and sedentary time with incident cardiovascular disease,  
11 cancer, and all-cause mortality. *Circ.* 2020;141(13):1113-5.  
12  
13
- 14 10. Ensrud KE, Blackwell TL, Cauley JA, et al. Objective measures of activity level and  
15 mortality in older men. *J Am Geriatr Soc.* 2014;62(11):2079-87.  
16  
17
- 18 11. Gilchrist SC, Howard VJ, Akinyemiju T, et al. Association of sedentary behavior with  
19 cancer mortality in middle-aged and older US adults. *JAMA Oncol.* 2020;6(8):1210-7.  
20  
21
- 22 12. Parada H, Jr., McDonald E, Bellettiere J, et al. Associations of accelerometer-measured  
23 physical activity and physical activity-related cancer incidence in older women: results  
24 from the WHI OPACH Study. *Br J Cancer.* 2020;122(9):1409-16.  
25  
26
- 27 13. Cook NR, Lee IM, Gaziano JM, et al. Low-dose aspirin in the primary prevention of  
28 cancer: the Women's Health Study: a randomized controlled trial. *JAMA.*  
29 2005;294(1):47-55.  
30  
31
- 32 14. Lee IM, Cook NR, Gaziano JM, et al. Vitamin E in the primary prevention of  
33 cardiovascular disease and cancer: the Women's Health Study: a randomized controlled  
34 trial. *JAMA.* 2005;294(1):56-65.  
35  
36
- 37 15. Ridker PM, Cook NR, Lee IM, et al. A randomized trial of low-dose aspirin in the primary  
38 prevention of cardiovascular disease in women. *New Engl J Med.* 2005;352(13):1293-  
39 1304.  
40  
41
- 42 16. Lee IM, Shiroma EJ, Evenson KR, et al. Using devices to assess physical activity and  
43 sedentary behavior in a large cohort study, the Women's Health Study. *J Measure*  
44 *Physical Behav.* 2018;1(2):60-9.  
45  
46  
47  
48  
49  
50  
51  
52  
53  
54  
55  
56  
57  
58  
59  
60

17. LaCroix AZ, Rillamas-Sun E, Buchner D, et al. The Objective Physical Activity and Cardiovascular Disease Health in Older Women (OPACH) Study. *BMC Public Health*. 2017;17(1):192.
18. Women's Health Initiative. Long Life Study (W64). [online]. Accessed at <https://sp.whi.org/studies/SitePages/Long%20Life%20Study.aspx>. 2021.
19. LaMonte MJ, Buchner DM, Rillamas-Sun E, et al. Accelerometer-measured physical activity and mortality in women aged 63 to 99. *J Am Geriatr Soc*. 2018;66(5):886-94.
20. Buchner DM, Rillamas-Sun E, Di C, et al. Accelerometer-measured moderate to vigorous physical activity and incidence rates of falls in older women. *J Am Geriatr Soc*. 2017;65(11):2480-7.
21. Bellettiere J, LaMonte MJ, Evenson KR, et al. Sedentary behavior and cardiovascular disease in older women: The Objective Physical Activity and Cardiovascular Health (OPACH) Study. *Circ*. 2019;139(8):1036-46.
22. LaCroix AZ, Bellettiere J, Rillamas-Sun E, et al. Association of light physical activity measured by accelerometry and incidence of coronary heart disease and cardiovascular disease in older women. *JAMA Network Open*. 2019;2(3):e190419.
23. Rillamas-Sun E, Buchner DM, Di C, et al. Development and application of an automated algorithm to identify a window of consecutive days of accelerometer wear for large-scale studies. *BMC Res Notes*. 2015;8:270.
24. Choi L, Ward SC, Schnelle JF, et al. Assessment of wear/nonwear time classification algorithms for triaxial accelerometer. *Med Sci Sports Exerc*. 2012;44(10):2009-16.
25. Choi L, Liu Z, Matthews CE, Buchowski MS. Validation of accelerometer wear and nonwear time classification algorithm. *Med Sci Sports Exerc*. 2011;43(2):357-64.
26. Evenson K, Wen F, Herring A, et al. Calibrating physical activity intensity for hip-worn accelerometry in women  $\geq 60$  years. *Prev Med Rep*. 2015;2:750-6.

- 1  
2  
3 27. Holliday KM, Howard AG, Emch M, Rodriguez DA, Rosamond WD, and Evenson KR.  
4  
5 Where are adults active? An examination of physical activity locations using GPS in five  
6  
7 United States cities. *J Urban Health*. 2017; 94(4), 459-469.  
8  
9 28. Holliday KM, Howard AG, Emch M, Rodriguez DA, and Evenson KR. Are buffers around  
10  
11 home representative of physical activity spaces among adults? *Health Place*. 2017; 45,  
12  
13 181-188.  
14  
15 29. Curb JD, McTiernan A, Heckbert SR, et al. Outcomes ascertainment and adjudication  
16  
17 methods in the Women's Health Initiative. *Ann Epidemiol*. 2003;13(9 Suppl):S122-8.  
18  
19 30. World Health Organization. *International Classification of Diseases for Oncology*.  
20  
21 Accessed at  
22  
23 [https://apps.who.int/iris/bitstream/handle/10665/96612/9789241548496\\_eng.pdf](https://apps.who.int/iris/bitstream/handle/10665/96612/9789241548496_eng.pdf). Malta:  
24  
25 World Health Organization; 2013.  
26  
27 31. de Jong VMT, Moons KGM, Riley RD, et al. Individual participant data meta-analysis of  
28  
29 intervention studies with time-to-event outcomes: a review of the methodology and an  
30  
31 applied example. *Res Synth Methods*. 2020;11(2):148-68.  
32  
33 32. Bai J, Di C, Xiao L, et al. An activity index for raw accelerometry data and its comparison  
34  
35 with other activity metrics. *PLoS One*. 2016;11(8):e0160644.  
36  
37 33. Evenson KR, Wen F, Metzger JS, et al. Physical activity and sedentary behavior  
38  
39 patterns using accelerometry from a national sample of United States adults. *Intl J*  
40  
41 *Behavior Nutr Physical Activity*. 2015;12(1):20.  
42  
43 34. Rosenberg D, Godbole S, Ellis K, et al. Classifiers for accelerometer-measured  
44  
45 behaviors in older women. *Med Sci Sports Exerc*. 2017;49(3):610-616.  
46  
47 35. Nakandala S, Jankowska M, Tuz-Zahra F, et al. Application of convolutional neural  
48  
49 network algorithms for advancing sedentary and activity bout classification. *J Measure*  
50  
51 *Physical Behaviour*. 2021;4(2), 102-110.  
52  
53  
54  
55  
56  
57  
58  
59  
60

- 1  
2  
3 36. Bellettiere J, Tuz-Zahra F, Carlson J, et al. Agreement of sedentary behavior metrics  
4 derived from hip- and thigh-worn accelerometers among older adults: with implications  
5 for studying physical and cognitive health. *J Measure Physical Behaviour*. 2021;4:79-88.  
6  
7  
8  
9 37. Keadle SK, Shiroma EJ, Kamada M, et al. Reproducibility of accelerometer-assessed  
10 physical activity and sedentary time. *Am J Prev Med*. 2017;52(4):541-8.  
11  
12  
13 38. Gurwitz J, Carlozzi N, Davison K, et al. National Institutes of Health Pathways to  
14 Prevention Workshop: physical activity and health for wheelchair users. *Archives of*  
15  
16  
17  
18  
19  
20  
21  
22  
23  
24  
25  
26  
27  
28  
29  
30  
31  
32  
33  
34  
35  
36  
37  
38  
39  
40  
41  
42  
43  
44  
45  
46  
47  
48  
49  
50  
51  
52  
53  
54  
55  
56  
57  
58  
59  
60

Table 1: Accelerometer wear overall and by cohort

|                                                      | Total  | Retained<br>% | WHS<br>n | Retained<br>% | WHI/OPACH<br>n | Retained<br>% |
|------------------------------------------------------|--------|---------------|----------|---------------|----------------|---------------|
| Sample invited to sub-study                          | 38,746 | 100           | 29,494   | 100           | 9252           | 100           |
| Agreed to participate and sent the accelerometer     | 25,337 | 65.4          | 18,289   | 62.0          | 7048           | 76.2          |
| Returned accelerometer                               | 24,429 | 63.0          | 17,708   | 60.0          | 6721           | 72.6          |
| Data were downloaded                                 | 23,955 | 61.8          | 17,466   | 59.2          | 6489           | 70.1          |
| At least one adherent day of wear ( $\geq 10$ hours) | 23,443 | 60.5          | 17,061   | 57.8          | 6382           | 69.0          |
| Adherent wear $\geq 4$ days of $\geq 10$ hours/day   | 22,868 | 59.0          | 16,742   | 56.8          | 6126           | 66.2          |
| Removed those with cancer at trial inception*        | 22,852 | 59.0          | 16,726   | 56.7          | 6126           | 66.2          |

Abbreviations: n, sample size; WHI/OPACH, Women's Health Initiative Objective Physical Activity and Cardiovascular Health; WHS, Women's Health Study

\*WHS began as a trial for the primary prevention of cancer and cardiovascular disease; however, post-randomization, 16 of the 16,742 women were subsequently found to have prevalent cancer and were excluded from the present study.

Table 2: Description of sample overall and by cohort

|                                                                 | Overall<br>(n=22,852) |       | WHS (n=16,726) |       | Missing | WHI/OPACH<br>(n=6126) |      | Missing |
|-----------------------------------------------------------------|-----------------------|-------|----------------|-------|---------|-----------------------|------|---------|
|                                                                 | Percent               | n     | Percent        | n     | Missing | Percent               | n    | Missing |
| <b>Age categories</b>                                           |                       |       |                |       |         |                       |      |         |
| 60-69                                                           | 35.1                  | 8019  | 44.2           | 7392  |         | 10.2                  | 627  | 0       |
| 70-79                                                           | 43.8                  | 10013 | 45.2           | 7565  |         | 40.0                  | 2448 |         |
| 80-89                                                           | 20.0                  | 4563  | 10.6           | 1769  |         | 45.6                  | 2794 |         |
| >=90                                                            | 1.1                   | 257   | 0.0            | 0     |         | 4.2                   | 257  |         |
| <b>Race/ethnicity</b>                                           |                       |       |                |       |         |                       |      |         |
| White                                                           | 83.1                  | 18984 | 95.3           | 15938 | 0       | 49.7                  | 3046 | 0       |
| Black                                                           | 10.1                  | 2300  | 1.5            | 253   |         | 33.4                  | 2047 |         |
| Hispanic                                                        | 5.2                   | 1184  | 0.9            | 151   |         | 16.9                  | 1033 |         |
| Unknown or other                                                | 1.7                   | 384   | 2.3            | 384   |         | 0.0                   | 0    |         |
| <b>Education</b>                                                |                       |       |                |       |         |                       |      |         |
| High school or less                                             | 5.5                   | 1237  | 0.0            | 0     | 269     | 20.3                  | 1237 | 41      |
| Some college                                                    | 46.7                  | 10531 | 49.7           | 8182  |         | 38.6                  | 2349 |         |
| College graduate or more                                        | 47.8                  | 10774 | 50.3           | 8275  |         | 41.1                  | 2499 |         |
| <b>Self-reported or measured near accelerometry measurement</b> |                       |       |                |       |         |                       |      |         |
| <u>General health</u>                                           |                       |       |                |       |         |                       |      |         |
| Excellent                                                       | 20.7                  | 4730  | 24.6           | 4115  | 5       | 10.1                  | 615  | 21      |
| Very good                                                       | 47.5                  | 10842 | 50.1           | 8371  |         | 40.5                  | 2471 |         |
| Good                                                            | 27.3                  | 6230  | 22.8           | 3804  |         | 39.7                  | 2426 |         |
| Fair or poor                                                    | 4.5                   | 1024  | 2.6            | 431   |         | 9.7                   | 593  |         |
| <b>Body mass index</b>                                          |                       |       |                |       |         |                       |      |         |
| <18.5                                                           | 1.8                   | 415   | 2.0            | 334   | 3       | 1.3                   | 81   | 386     |
| 18.5-24.9                                                       | 39.2                  | 8953  | 43.1           | 7215  |         | 28.4                  | 1738 |         |
| 25.0-29.9                                                       | 33.6                  | 7672  | 33.6           | 5624  |         | 33.4                  | 2048 |         |

For peer review only

|    |                                                       |      |       |      |      |   |      |      |
|----|-------------------------------------------------------|------|-------|------|------|---|------|------|
| 1  |                                                       |      |       |      |      |   |      |      |
| 2  |                                                       |      |       |      |      |   |      |      |
| 3  | 30.0-34.9                                             | 14.7 | 3356  | 13.5 | 2263 |   | 17.8 | 1093 |
| 4  | 35.0-39.9                                             | 5.0  | 1145  | 4.1  | 692  |   | 7.4  | 453  |
| 5  | >=40                                                  | 2.1  | 486   | 1.6  | 261  |   | 3.7  | 225  |
| 6  |                                                       |      |       |      |      |   |      |      |
| 7  |                                                       |      |       |      |      |   |      |      |
| 8  | Smoking                                               |      |       |      |      | 1 |      | 582  |
| 9  | Current                                               | 3.4  | 749   | 3.5  | 590  |   | 2.9  | 159  |
| 10 | Former                                                | 45.1 | 10046 | 46.0 | 7695 |   | 42.4 | 2351 |
| 11 | Never                                                 | 51.5 | 11474 | 50.5 | 8440 |   | 54.7 | 3034 |
| 12 |                                                       |      |       |      |      |   |      |      |
| 13 |                                                       |      |       |      |      |   |      |      |
| 14 | Alcohol                                               |      |       |      |      | 7 |      | 536  |
| 15 | Never or rarely                                       | 37.9 | 8445  | 38.0 | 6356 |   | 37.4 | 2089 |
| 16 | Monthly                                               | 15.9 | 3558  | 9.8  | 1646 |   | 34.2 | 1912 |
| 17 | Weekly                                                | 32.9 | 7340  | 36.3 | 6069 |   | 22.7 | 1271 |
| 18 | Daily                                                 | 13.3 | 2966  | 15.9 | 2648 |   | 5.7  | 318  |
| 19 |                                                       |      |       |      |      |   |      |      |
| 20 |                                                       |      |       |      |      |   |      |      |
| 21 | Walking speed                                         |      |       |      |      | 4 |      | 261  |
| 22 | <2 mph                                                | 21.5 | 4906  | 17.5 | 2931 |   | 32.2 | 1975 |
| 23 | 2-2.9 mph                                             | 40.2 | 9185  | 42.7 | 7143 |   | 33.3 | 2042 |
| 24 | 3-3.9 mph                                             | 20.7 | 4728  | 25.5 | 4271 |   | 7.5  | 457  |
| 25 | >=4 mph                                               | 1.5  | 350   | 2.0  | 332  |   | 0.3  | 18   |
| 26 | Unknown or does not walk regularly                    | 15.0 | 3418  | 12.2 | 2045 |   | 22.4 | 1373 |
| 27 |                                                       |      |       |      |      |   |      |      |
| 28 |                                                       |      |       |      |      |   |      |      |
| 29 | <u>Medical history near accelerometry measurement</u> |      |       |      |      |   |      |      |
| 30 | Using postmenopausal hormones                         | 7.9  | 1812  | 9.9  | 1657 | 6 | 2.5  | 155  |
| 31 | Diabetes history                                      | 12.0 | 2747  | 9.0  | 1501 | 0 | 20.3 | 1246 |
| 32 | Coronary heart disease                                | 5.8  | 1328  | 4.3  | 712  | 0 | 10.1 | 616  |
| 33 | Oophorectomy, bilateral                               | 21.4 | 4873  | 22.2 | 3718 | 0 | 19.2 | 1155 |
| 34 | Hysterectomy                                          | 41.9 | 9568  | 41.6 | 6957 | 0 | 42.6 | 2611 |
| 35 | Cancer at accelerometry measurement                   | 11.8 | 2696  | 11.9 | 1982 | 0 | 11.7 | 714  |
| 36 |                                                       |      |       |      |      |   |      |      |
| 37 |                                                       |      |       |      |      |   |      |      |
| 38 |                                                       |      |       |      |      |   |      |      |

Abbreviations: n, sample size; SD, standard deviation; WHI/OPACH, Women's Health Initiative Objective Physical Activity and Cardiovascular Health; WHS, Women's Health Study

\*WHS and WHI/OPACH categories were compared using chi-square tests. All associations were significant at  $p < 0.0001$ .



Table 3: Description of accelerometry measures overall and by cohort

|                                               | Overall<br>(n=22,852) |        | WHS (n=16,726) |        | WHI/OPACH (n=6126) |        |
|-----------------------------------------------|-----------------------|--------|----------------|--------|--------------------|--------|
|                                               | Percent               |        | Percent        |        | Percent            |        |
| Number of adherent days                       |                       |        |                |        |                    |        |
| 4 days                                        | 2.0                   |        | 1.6            |        | 2.9                |        |
| 5 days                                        | 4.4                   |        | 3.6            |        | 6.6                |        |
| 6 days                                        | 18.0                  |        | 15.0           |        | 26.2               |        |
| 7 days                                        | 75.6                  |        | 79.8           |        | 64.3               |        |
| Number of weekend days                        |                       |        |                |        |                    |        |
| 0 days                                        | 1.2                   |        | 1.0            |        | 1.6                |        |
| 1 day                                         | 8.5                   |        | 7.4            |        | 11.3               |        |
| 2 or more                                     | 90.4                  |        | 91.6           |        | 87.0               |        |
|                                               | Mean                  | SD     | Mean           | SD     | Mean               | SD     |
| Wear time on adherent days, hours/day         | 14.9                  | 1.3    | 14.9           | 1.3    | 14.9               | 1.3    |
| Average daily vector magnitude per 15-seconds | 134.0                 | 53.9   | 146.0          | 52.8   | 101.2              | 42.1   |
| Average daily steps/day                       | 4975.9                | 2668.8 | 5489.4         | 2658.2 | 3573.1             | 2142.3 |
| Average minutes/day using vector magnitude:   |                       |        |                |        |                    |        |
| Sedentary behavior                            | 522.7                 | 101.0  | 510.6          | 98.8   | 555.6              | 99.4   |
| Light low                                     | 182.1                 | 46.1   | 179.6          | 44.2   | 188.9              | 50.2   |
| Light high                                    | 105.5                 | 33.3   | 108.2          | 32.1   | 98.0               | 35.5   |
| Moderate to vigorous                          | 80.8                  | 46.5   | 91.9           | 45.4   | 50.4               | 34.4   |
| Moderate to vigorous bouts                    | 15.0                  | 22.8   | 18.2           | 24.6   | 6.4                | 13.6   |

For peer review only

1  
2  
3  
4  
5 Abbreviations: n, sample size; SD, standard deviation; WHI/OPACH, Women's Health Initiative Objective Physical Activity and Cardiovascular  
6 Health; WHS, Women's Health Study  
7  
8  
9  
10  
11  
12  
13  
14  
15  
16  
17  
18  
19  
20  
21  
22  
23  
24  
25  
26  
27  
28  
29  
30  
31  
32  
33  
34  
35  
36  
37  
38  
39  
40  
41  
42  
43  
44  
45  
46  
47

For peer review only

Table 4: Description of accelerometry measures by cohort stratified by age tertiles\*

|                                               | Age 60-69 years |        |                   |        | Age 70-76 years |        |                    |        | Age 77+ years |        |                    |        |
|-----------------------------------------------|-----------------|--------|-------------------|--------|-----------------|--------|--------------------|--------|---------------|--------|--------------------|--------|
|                                               | WHS (n=7392)    |        | WHI/OPACH (n=627) |        | WHS (n=6168)    |        | WHI/OPACH (n=1781) |        | WHS (n=3166)  |        | WHI/OPACH (n=3718) |        |
|                                               | Mean            | SD     | Mean              | SD     | Mean            | SD     | Mean               | SD     | Mean          | SD     | Mean               | SD     |
| Wear time on adherent days, hours/day         | 15.0            | 1.2    | 15.1              | 1.3    | 14.8            | 1.2    | 15.0               | 1.3    | 14.7          | 1.3    | 14.8               | 1.3    |
| Average daily vector magnitude per 15-seconds | 159.7           | 53.6   | 125.5             | 43.7   | 142.5           | 50.1   | 113.8              | 43.9   | 120.4         | 44.6   | 91.1               | 37.4   |
| Average daily steps/day                       | 6268.2          | 2693.7 | 5045.9            | 2477.3 | 5308.5          | 2499.4 | 4245.0             | 2211.0 | 4023.5        | 2142.9 | 3003.2             | 1811.7 |
| Average minutes/day using vector magnitude:   |                 |        |                   |        |                 |        |                    |        |               |        |                    |        |
| Sedentary behavior                            | 499.9           | 99.1   | 527.8             | 99.2   | 512.9           | 98.0   | 538.2              | 101.3  | 531.4         | 96.0   | 568.6              | 96.3   |
| Light low                                     | 182.7           | 44.2   | 200.7             | 47.2   | 177.8           | 43.3   | 193.9              | 49.3   | 176.0         | 45.6   | 184.5              | 50.5   |
| Light high                                    | 109.0           | 31.3   | 107.5             | 34.1   | 108.7           | 32.4   | 103.7              | 34.8   | 105.8         | 33.1   | 93.7               | 35.5   |
| Moderate to vigorous                          | 105.0           | 44.9   | 72.7              | 36.8   | 88.8            | 43.1   | 61.2               | 36.3   | 67.4          | 39.4   | 41.4               | 29.5   |
| Moderate to vigorous bouts                    | 22.3            | 26.9   | 11.0              | 16.8   | 17.1            | 23.0   | 8.8                | 16.2   | 10.6          | 19.5   | 4.5                | 11.0   |

Abbreviations: n, sample size; SD, standard deviation; WHI/OPACH, Women’s Health Initiative Objective Physical Activity and Cardiovascular Health; WHS, Women’s Health Study

\* Age was categorized based on WHAC-specific tertiles: 60-69 years, 70-76 years, and 77+ years.

Supplemental Table 1: International Classification of Diseases for Oncology, 3rd Ed. Codes for each cancer site used in ascertainment of primary incident invasive cancers across cohorts. This coding was developed from Moore et al.<sup>3</sup>

| Cancer site                  | ICD-O-3 codes and, if applicable, ICD-O-3 histology <sup>†</sup>                                                                                                                                                                                                                                                                     |
|------------------------------|--------------------------------------------------------------------------------------------------------------------------------------------------------------------------------------------------------------------------------------------------------------------------------------------------------------------------------------|
| Esophageal adenocarcinoma    | C150-159& histologies: 8140, 8142, 8144, 8261, 8310, 8480, 8481, 8570                                                                                                                                                                                                                                                                |
| Gallbladder                  | C239                                                                                                                                                                                                                                                                                                                                 |
| Liver*                       | C220 and C221                                                                                                                                                                                                                                                                                                                        |
| Lung                         | C340-C349                                                                                                                                                                                                                                                                                                                            |
| Kidney                       | C649 and C659                                                                                                                                                                                                                                                                                                                        |
| Small intestine              | C170-179                                                                                                                                                                                                                                                                                                                             |
| Gastric cardia               | C160                                                                                                                                                                                                                                                                                                                                 |
| Endometrial                  | C540-C549 and C559                                                                                                                                                                                                                                                                                                                   |
| Esophageal squamous          | C150-159 and histologies 8041, 8070-8072, 8074                                                                                                                                                                                                                                                                                       |
| Myeloid leukemia             | Acute myeloid leukemia: any histology of 9840, 9861, 9865-9867, 9869, 9871-9874, 9895-9898, 9910-9911, 9920<br>Acute monocytic leukemia: any histology of 9891<br>Chronic myeloid leukemia: any histology of 9863, 9875-9876, 9945-9946<br>Other myeloid/monocytic leukemia: any histology of 9860, 9930                             |
| Myeloma                      | Any histology of 9731-9732, 9734                                                                                                                                                                                                                                                                                                     |
| Colon                        | C180-C189, C260                                                                                                                                                                                                                                                                                                                      |
| Head and neck                | Lip: C000-C009<br>Tongue: C019-C029<br>Salivary gland: C079-C089<br>Floor of mouth: C040-C049<br>Gum and other mouth: C030-C039, C050-C059, C060-C069<br>Nasopharynx: C110-C119<br>Tonsil: C090-C099<br>Oropharynx: C100-C109<br>Hypopharynx: C129, C30-C139<br>Other oral cavity and pharynx: C140, C142, C148<br>Larynx: C320-C329 |
| Rectum                       | C199, C209                                                                                                                                                                                                                                                                                                                           |
| Bladder                      | C670-C679                                                                                                                                                                                                                                                                                                                            |
| Breast                       | C500-C509                                                                                                                                                                                                                                                                                                                            |
| Non-Hodgkin's Lymphoma (NHL) | NHL-nodal: C024, C098, C099, C111, C142, C379, C422, C770-C779 and histologies: 9590-9597, 9670-9671, 9673, 9675, 9678-9680, 9684,                                                                                                                                                                                                   |

|                                           |                                                                                                                                                                                                                                                                                 |
|-------------------------------------------|---------------------------------------------------------------------------------------------------------------------------------------------------------------------------------------------------------------------------------------------------------------------------------|
|                                           | 9687-9691, 9695, 9698-9702, 9705, 9708, 9709, 9712, 9714-9719, 9724-9729, 9735, 9737, 9738, 9811-9818, 9823, 9827, 9837                                                                                                                                                         |
|                                           | NHL-extranodal, definition 1: All sites except C024, C098-C099, C111, C142, C379, C422, C770-C779 and histologies of: 9590-9597, 9670-9671, 9673, 9675, 9678-9680, 9684, 9687, 9688, 9689-9691, 9695, 9698-9702, 9705, 9708, 9709, 9712, 9714-9719, 9724-9729, 9735, 9737, 9738 |
|                                           | NHL-extranodal, definition 2: All sites except C024, C098, C099, C111, C142, C379, C420-C422, C424, C770-C779 and histologies of: 9811-9818, 9823, 9827, 9837                                                                                                                   |
| Thyroid                                   | C739                                                                                                                                                                                                                                                                            |
| Gastric non-cardia                        | C161-169                                                                                                                                                                                                                                                                        |
| Soft tissue                               | C380, C470-C479, C490-C499                                                                                                                                                                                                                                                      |
| Pancreas                                  | C250-C259                                                                                                                                                                                                                                                                       |
| Lymphocytic leukemia                      | Acute lymphocytic leukemia, definition 1: Any histology of 9826, 9835-9836                                                                                                                                                                                                      |
|                                           | Acute lymphocytic leukemia, definition 2: C420, C421, C424 and histologies: 9811-9818, 9837                                                                                                                                                                                     |
|                                           | Chronic lymphocytic leukemia: C420, C421, C424 and histology 9823                                                                                                                                                                                                               |
|                                           | Other lymphocytic leukemia: Any histology of 9820, 9832-9834, 9940.                                                                                                                                                                                                             |
| Ovary                                     | C569                                                                                                                                                                                                                                                                            |
| Brain                                     | C710-C719                                                                                                                                                                                                                                                                       |
| Prostate†                                 | C619                                                                                                                                                                                                                                                                            |
| Skin cancer, excluding basal and squamous | Melanoma: C440-C449 and histologies 8720-8790<br>Other non-epithelial skin: C440-C449, excluding histologies 8000-8005, 8010-8046, 8050-8084, 8090-8110, 8720-8790, 9050-9055, 9140, 9590-9992                                                                                  |

\* A small proportion of the liver cancer classification consists of intrahepatic bile duct cancer cases.

† A small proportion of the kidney cancer classification consists of renal pelvis cancer cases.

‡ Unless otherwise stated, cancer definitions exclude the histologies 9050-9055, 9140, and 9590-9992.

STROBE Statement—Checklist of items that should be included in reports of *cohort studies*

|                              | Item No | Recommendation                                                                                                                                                                                                                                                                                                         | Page No |
|------------------------------|---------|------------------------------------------------------------------------------------------------------------------------------------------------------------------------------------------------------------------------------------------------------------------------------------------------------------------------|---------|
| <b>Title and abstract</b>    | 1       | (a) Indicate the study's design with a commonly used term in the title or the abstract<br>(b) Provide in the abstract an informative and balanced summary of what was done and what was found                                                                                                                          | 3       |
| <b>Introduction</b>          |         |                                                                                                                                                                                                                                                                                                                        |         |
| Background/rationale         | 2       | Explain the scientific background and rationale for the investigation being reported                                                                                                                                                                                                                                   | 4       |
| Objectives                   | 3       | State specific objectives, including any prespecified hypotheses                                                                                                                                                                                                                                                       | 5       |
| <b>Methods</b>               |         |                                                                                                                                                                                                                                                                                                                        |         |
| Study design                 | 4       | Present key elements of study design early in the paper                                                                                                                                                                                                                                                                | 6       |
| Setting                      | 5       | Describe the setting, locations, and relevant dates, including periods of recruitment, exposure, follow-up, and data collection                                                                                                                                                                                        | 6       |
| Participants                 | 6       | (a) Give the eligibility criteria, and the sources and methods of selection of participants. Describe methods of follow-up<br>(b) For matched studies, give matching criteria and number of exposed and unexposed                                                                                                      | 6       |
| Variables                    | 7       | Clearly define all outcomes, exposures, predictors, potential confounders, and effect modifiers. Give diagnostic criteria, if applicable                                                                                                                                                                               | 8       |
| Data sources/<br>measurement | 8*      | For each variable of interest, give sources of data and details of methods of assessment (measurement). Describe comparability of assessment methods if there is more than one group                                                                                                                                   | 7-10    |
| Bias                         | 9       | Describe any efforts to address potential sources of bias                                                                                                                                                                                                                                                              | n/a     |
| Study size                   | 10      | Explain how the study size was arrived at                                                                                                                                                                                                                                                                              | 11      |
| Quantitative variables       | 11      | Explain how quantitative variables were handled in the analyses. If applicable, describe which groupings were chosen and why                                                                                                                                                                                           | 10-11   |
| Statistical methods          | 12      | (a) Describe all statistical methods, including those used to control for confounding<br>(b) Describe any methods used to examine subgroups and interactions<br>(c) Explain how missing data were addressed<br>(d) If applicable, explain how loss to follow-up was addressed<br>(e) Describe any sensitivity analyses | 10-11   |
| <b>Results</b>               |         |                                                                                                                                                                                                                                                                                                                        |         |
| Participants                 | 13*     | (a) Report numbers of individuals at each stage of study—eg numbers potentially eligible, examined for eligibility, confirmed eligible, included in the study, completing follow-up, and analysed<br>(b) Give reasons for non-participation at each stage<br>(c) Consider use of a flow diagram                        | 11      |
| Descriptive data             | 14*     | (a) Give characteristics of study participants (eg demographic, clinical, social) and information on exposures and potential confounders<br>(b) Indicate number of participants with missing data for each variable of interest<br>(c) Summarise follow-up time (eg, average and total amount)                         | 12      |
| Outcome data                 | 15*     | Report numbers of outcome events or summary measures over time                                                                                                                                                                                                                                                         | na      |

|    |                          |    |                                                                                                                                                                                                              |       |
|----|--------------------------|----|--------------------------------------------------------------------------------------------------------------------------------------------------------------------------------------------------------------|-------|
| 1  | Main results             | 16 | (a) Give unadjusted estimates and, if applicable, confounder-adjusted estimates and their precision (eg, 95% confidence interval). Make clear which confounders were adjusted for and why they were included | na    |
| 2  |                          |    | (b) Report category boundaries when continuous variables were categorized                                                                                                                                    |       |
| 3  |                          |    | (c) If relevant, consider translating estimates of relative risk into absolute risk for a meaningful time period                                                                                             |       |
| 4  |                          |    |                                                                                                                                                                                                              |       |
| 5  |                          |    |                                                                                                                                                                                                              |       |
| 6  |                          |    |                                                                                                                                                                                                              |       |
| 7  |                          |    |                                                                                                                                                                                                              |       |
| 8  |                          |    |                                                                                                                                                                                                              |       |
| 9  | Other analyses           | 17 | Report other analyses done—eg analyses of subgroups and interactions, and sensitivity analyses                                                                                                               | na    |
| 10 |                          |    |                                                                                                                                                                                                              |       |
| 11 | <b>Discussion</b>        |    |                                                                                                                                                                                                              |       |
| 12 |                          |    |                                                                                                                                                                                                              |       |
| 13 | Key results              | 18 | Summarise key results with reference to study objectives                                                                                                                                                     | na    |
| 14 | Limitations              | 19 | Discuss limitations of the study, taking into account sources of potential bias or imprecision. Discuss both direction and magnitude of any potential bias                                                   | 13-14 |
| 15 |                          |    |                                                                                                                                                                                                              |       |
| 16 | Interpretation           | 20 | Give a cautious overall interpretation of results considering objectives, limitations, multiplicity of analyses, results from similar studies, and other relevant evidence                                   | 13-14 |
| 17 |                          |    |                                                                                                                                                                                                              |       |
| 18 |                          |    |                                                                                                                                                                                                              |       |
| 19 | Generalisability         | 21 | Discuss the generalisability (external validity) of the study results                                                                                                                                        | 13-14 |
| 20 |                          |    |                                                                                                                                                                                                              |       |
| 21 | <b>Other information</b> |    |                                                                                                                                                                                                              |       |
| 22 |                          |    |                                                                                                                                                                                                              |       |
| 23 | Funding                  | 22 | Give the source of funding and the role of the funders for the present study and, if applicable, for the original study on which the present article is based                                                | 15-16 |
| 24 |                          |    |                                                                                                                                                                                                              |       |
| 25 |                          |    |                                                                                                                                                                                                              |       |

26 \*Give information separately for exposed and unexposed groups.

27  
28  
29 **Note:** An Explanation and Elaboration article discusses each checklist item and gives methodological background and published examples of transparent reporting. The STROBE checklist is best used in conjunction with this article (freely available on the Web sites of PLoS Medicine at <http://www.plosmedicine.org/>, Annals of Internal Medicine at <http://www.annals.org/>, and Epidemiology at <http://www.epidem.com/>). Information on the STROBE Initiative is available at <http://www.strobe-statement.org>.

30  
31  
32  
33  
34  
35  
36  
37  
38  
39  
40  
41  
42  
43  
44  
45  
46  
47  
48  
49  
50  
51  
52  
53  
54  
55  
56  
57  
58  
59  
60
