# Supplementary material for: Cohort profile: the Women’s Health Accelerometry Collaboration
Source: PubMed Central journal article supplement — BMJ Open. 2021 Nov 29;11(11):e052038. doi: 10.1136/bmjopen-2021-052038 (PMC8633996; doi:10.1136/bmjopen-2021-052038), 2021-11-29
Supplement: bmjopen-2021-052038supp001.pdf [file bmjopen-2021-052038supp001.pdf]

Supplemental Table 1: International Classification of Diseases for Oncology, 3rd Ed. Codes for each cancer site used in ascertainment of primary incident invasive cancers across cohorts. This coding was developed from Moore et al.<sup>3</sup>

| Cancer site                  | ICD-O-3 codes and, if applicable, ICD-O-3 histology <sup>†</sup>                                                                                                                                                                                                                                                                     |
|------------------------------|--------------------------------------------------------------------------------------------------------------------------------------------------------------------------------------------------------------------------------------------------------------------------------------------------------------------------------------|
| Esophageal adenocarcinoma    | C150-159& histologies: 8140, 8142, 8144, 8261, 8310, 8480, 8481, 8570                                                                                                                                                                                                                                                                |
| Gallbladder                  | C239                                                                                                                                                                                                                                                                                                                                 |
| Liver*                       | C220 and C221                                                                                                                                                                                                                                                                                                                        |
| Lung                         | C340-C349                                                                                                                                                                                                                                                                                                                            |
| Kidney                       | C649 and C659                                                                                                                                                                                                                                                                                                                        |
| Small intestine              | C170-179                                                                                                                                                                                                                                                                                                                             |
| Gastric cardia               | C160                                                                                                                                                                                                                                                                                                                                 |
| Endometrial                  | C540-C549 and C559                                                                                                                                                                                                                                                                                                                   |
| Esophageal squamous          | C150-159 and histologies 8041, 8070-8072, 8074                                                                                                                                                                                                                                                                                       |
| Myeloid leukemia             | Acute myeloid leukemia: any histology of 9840, 9861, 9865-9867, 9869, 9871-9874, 9895-9898, 9910-9911, 9920<br>Acute monocytic leukemia: any histology of 9891<br>Chronic myeloid leukemia: any histology of 9863, 9875-9876, 9945-9946<br>Other myeloid/monocytic leukemia: any histology of 9860, 9930                             |
| Myeloma                      | Any histology of 9731-9732, 9734                                                                                                                                                                                                                                                                                                     |
| Colon                        | C180-C189, C260                                                                                                                                                                                                                                                                                                                      |
| Head and neck                | Lip: C000-C009<br>Tongue: C019-C029<br>Salivary gland: C079-C089<br>Floor of mouth: C040-C049<br>Gum and other mouth: C030-C039, C050-C059, C060-C069<br>Nasopharynx: C110-C119<br>Tonsil: C090-C099<br>Oropharynx: C100-C109<br>Hypopharynx: C129, C30-C139<br>Other oral cavity and pharynx: C140, C142, C148<br>Larynx: C320-C329 |
| Rectum                       | C199, C209                                                                                                                                                                                                                                                                                                                           |
| Bladder                      | C670-C679                                                                                                                                                                                                                                                                                                                            |
| Breast                       | C500-C509                                                                                                                                                                                                                                                                                                                            |
| Non-Hodgkin's Lymphoma (NHL) | NHL-nodal: C024, C098, C099, C111, C142, C379, C422, C770-C779 and histologies: 9590-9597, 9670-9671, 9673, 9675, 9678-9680, 9684,                                                                                                                                                                                                   |

|                                           |                                                                                                                                                                                                                                                                                                                       |
|-------------------------------------------|-----------------------------------------------------------------------------------------------------------------------------------------------------------------------------------------------------------------------------------------------------------------------------------------------------------------------|
|                                           | 9687-9691, 9695, 9698-9702, 9705, 9708, 9709, 9712, 9714-9719, 9724-9729, 9735, 9737, 9738, 9811-9818, 9823, 9827, 9837                                                                                                                                                                                               |
|                                           | NHL-extranodal, definition 1: All sites except C024, C098-C099, C111, C142, C379, C422, C770-C779 and histologies of: 9590-9597, 9670-9671, 9673, 9675, 9678-9680, 9684, 9687, 9688, 9689-9691, 9695, 9698-9702, 9705, 9708, 9709, 9712, 9714-9719, 9724-9729, 9735, 9737, 9738                                       |
|                                           | NHL-extranodal, definition 2: All sites except C024, C098, C099, C111, C142, C379, C420-C422, C424, C770-C779 and histologies of: 9811-9818, 9823, 9827, 9837                                                                                                                                                         |
| Thyroid                                   | C739                                                                                                                                                                                                                                                                                                                  |
| Gastric non-cardia                        | C161-169                                                                                                                                                                                                                                                                                                              |
| Soft tissue                               | C380, C470-C479, C490-C499                                                                                                                                                                                                                                                                                            |
| Pancreas                                  | C250-C259                                                                                                                                                                                                                                                                                                             |
| Lymphocytic leukemia                      | Acute lymphocytic leukemia, definition 1: Any histology of 9826, 9835-9836<br>Acute lymphocytic leukemia, definition 2: C420, C421, C424 and histologies: 9811-9818, 9837<br>Chronic lymphocytic leukemia: C420, C421, C424 and histology 9823<br>Other lymphocytic leukemia: Any histology of 9820, 9832-9834, 9940. |
| Ovary                                     | C569                                                                                                                                                                                                                                                                                                                  |
| Brain                                     | C710-C719                                                                                                                                                                                                                                                                                                             |
| Prostate†                                 | C619                                                                                                                                                                                                                                                                                                                  |
| Skin cancer, excluding basal and squamous | Melanoma: C440-C449 and histologies 8720-8790<br>Other non-epithelial skin: C440-C449, excluding histologies 8000-8005, 8010-8046, 8050-8084, 8090-8110, 8720-8790, 9050-9055, 9140, 9590-9992                                                                                                                        |

\* A small proportion of the liver cancer classification consists of intrahepatic bile duct cancer cases.

† A small proportion of the kidney cancer classification consists of renal pelvis cancer cases.

‡ Unless otherwise stated, cancer definitions exclude the histologies 9050-9055, 9140, and 9590-9992.
